# Supplementary material for: Integrating chest radiography tuberculosis screening and preventive treatment for contacts in primary healthcare settings in Pakistan
Source: Research Square preprint supplement (doi:10.21203/rs.3.rs-7785377/v1), 2025-11-06
Supplement: Supplementary file 1 [file 5420a6f070569562d882358a.xlsx]

## Sheet: Sheet1
Variable	Description
Facility	Facility Title
District	District
Patient Type	Index or Household Contact
Gender	Gender of Patient
Age	Age in years
age_lt_1	Is your age less than one year ?
Age (completed months)	Age in months
Type of contact	Type of contact
Were symptoms asked?	Were symptoms asked?
Presence of symptoms	Were symptoms present?
symptoms	Whare are your symptoms?
CXR Result	Result of X-ray
Gene Xpert	Result of Gene Xpert
Sputum Smear Result	Result of Sputum Smear
Decision Taken	Decision Taken at Screening level
Treatment Initiated	Was TPT initiated?
Marital Status	Marital Status of HHCs
Years of Schooling	Education of HHCs
Regiment TPT	Prescribed Regiment of TB Preventive Treatment to HHCs
TPT Outcome	TPT Outcome declared
Was TPT restarted?	Was TPT restarted?
