# Supplementary material for: Integrating chest radiography tuberculosis screening and preventive treatment for contacts in primary healthcare settings in Pakistan
Source: Research Square preprint supplement (doi:10.21203/rs.3.rs-7785377/v1), 2025-11-06
Supplement: Supplementary file 1 [file ec287b2c378e61a548ff1e30.pdf]

***Integrating chest radiography tuberculosis screening and preventive treatment  
for contacts in primary healthcare settings in Pakistan***

**Topic guide: DTC District Manager**

| Areas                                                                                                                                          | Prompts                                                                                                                                                                                                                                                                                                                                                                                                                                                                   |
|------------------------------------------------------------------------------------------------------------------------------------------------|---------------------------------------------------------------------------------------------------------------------------------------------------------------------------------------------------------------------------------------------------------------------------------------------------------------------------------------------------------------------------------------------------------------------------------------------------------------------------|
|                                                                                                                                                | <b>Experience: how done, challenges (time, social etc.) and how managed</b>                                                                                                                                                                                                                                                                                                                                                                                               |
| Would you kindly share your experience of <b>coordinating/monitoring</b> TB screening and TB preventive treatment for household contacts?      | <ul style="list-style-type: none"> <li>• Monitoring facilities progress and following intervention protocols</li> <li>• Support from program team</li> <li>• Barriers and facilitators faced in implementation</li> </ul>                                                                                                                                                                                                                                                 |
| Would you kindly share you experience of <b>using “Prevent TB Application”</b> of household contacts on screening and TB preventing treatment? | <ul style="list-style-type: none"> <li>• Using prevent TB application for monitoring TB screening and TB preventive treatment data of household contacts <ul style="list-style-type: none"> <li>○ User experience (feasibility of using app)</li> <li>○ Difficulty in navigating the dashboard</li> <li>○ Functioning of dashboard/serve issues</li> <li>○ Challenge address mechanism and support</li> <li>○ Use of Prevent TB as monitoring tool</li> </ul> </li> </ul> |
| Would you kindly share you experience of <b>getting trained</b> for screening and TB preventive treatment of household contacts?               | <ul style="list-style-type: none"> <li>• Staff training <ul style="list-style-type: none"> <li>○ Training content</li> <li>○ Training conduct</li> </ul> </li> </ul>                                                                                                                                                                                                                                                                                                      |
| Any other issue/ comment                                                                                                                       | <ul style="list-style-type: none"> <li>• Anything else you want to: <ul style="list-style-type: none"> <li>○ Tell</li> <li>○ Ask</li> </ul> </li> </ul>                                                                                                                                                                                                                                                                                                                   |
