# Supplementary material for: Integrating chest radiography tuberculosis screening and preventive treatment for contacts in primary healthcare settings in Pakistan
Source: Research Square preprint supplement (doi:10.21203/rs.3.rs-7785377/v1), 2025-11-06
Supplement: Supplementary file 2 [file 7b8ad39276f3b18d6ad5f6e0.xlsx]

## Sheet: Patient Data
Facility	District	Patient type	Gender	Age (completed years)	age_lt_1	Age (completed months)	Type of Contact	Were symptoms asked ?	Presence of symptoms	Symptoms	CXR Result	Gene Xpert Result	Sputum Smear Result	Decision Taken	Treatment initiated	Martial Status	Years of Schooling	Regimen TPT	TPT Outcome	Was TPT restarted ?
RHC 10	Nankana Sahib	Contact	Male	3	No		Contact	Yes	NO					Refusal
DHQ 2	Nankana Sahib	Contact	Male	2	No		Contact							Loss to Follow up
DHQ 2	Nankana Sahib	Contact	Male	14	No		Contact	No						Refusal
DHQ 2	Nankana Sahib	Contact	Male	3	No		Contact							Loss to Follow up
DHQ 1	Hafizabad	Contact	Male	30	No		Contact							Refusal
RHC 5	Hafizabad	Contact	Male	2	No		Contact							Loss to Follow up
THQ 2	Nankana Sahib	Contact	Female	18	No		Contact	Yes	NO					Refusal
DHQ 1	Hafizabad	Contact	Male	10	No		Contact							Refusal
RHC 5	Hafizabad	Contact	Male	28	No		Contact							Refusal
THQ 2	Nankana Sahib	Contact	Male	50	No		Contact	Yes	NO					Refusal
THQ 1	Hafizabad	Contact	Female	2	No		Contact	Yes	NO		Abnormality not detected			TPT Eligible	NO
RHC 1	Hafizabad	Contact	Male	4	No		Contact							Loss to Follow up
DHQ 2	Nankana Sahib	Contact	Male	2	No		Contact							Loss to Follow up
RHC 14	Nankana Sahib	Contact	Male	15	No		Contact							Refusal
RHC 2	Hafizabad	Contact	Male	15	No		Contact							Refusal
RHC 3	Nankana Sahib	Contact	Male	16	No		Contact	Yes	NO					Refusal
RHC 10	Nankana Sahib	Contact	Male	62	No		Contact							Refusal
RHC 4	Hafizabad	Contact	Female	10	No		Contact	Yes	NO		Abnormality not detected			TPT Eligible	NO
RHC 1	Hafizabad	Contact	Male	0	Yes	6 Month	Contact							Refusal
DHQ 2	Nankana Sahib	Contact	Female	12	No		Contact	Yes	NO		Abnormality not detected			TPT Eligible	NO
RHC 14	Nankana Sahib	Contact	Male	12	No		Contact	Yes	NO		Abnormality not detected			TPT Eligible	NO
THQ 2	Nankana Sahib	Contact	Male	12	No		Contact							Loss to Follow up
THQ 2	Nankana Sahib	Contact	Male	12	No		Contact							Loss to Follow up
DHQ 2	Nankana Sahib	Contact	Male	4	No		Contact	Yes	NO					Refusal
RHC 1	Hafizabad	Contact	Male	7	No		Contact							Refusal
RHC 1	Hafizabad	Contact	Male	10	No		Contact							Refusal
RHC 3	Hafizabad	Contact	Female	13	No		Contact	Yes	NO		Abnormality not detected			TPT Eligible	NO
RHC 3	Hafizabad	Contact	Male	13	No		Contact	Yes	NO		Abnormality not detected			TPT Eligible	NO
THQ 2	Nankana Sahib	Contact	Male	27	No		Contact	Yes	NO					Refusal
THQ 2	Nankana Sahib	Contact	Male	14	No		Contact							Loss to Follow up
RHC 13	Nankana Sahib	Contact	Male	15	No		Contact	Yes	NO		Abnormality not detected			TPT Eligible	NO
RHC 1	Hafizabad	Contact	Male	10	No		Contact							Refusal
THQ 1	Hafizabad	Contact	Male	8	No		Contact							Refusal
THQ 1	Hafizabad	Contact	Male	22	No		Contact							Refusal
THQ 2	Nankana Sahib	Contact	Female	15	No		Contact							Loss to Follow up
RHC 13	Nankana Sahib	Contact	Female	16	No		Contact	Yes	NO		Abnormality not detected			TPT Eligible	NO
RHC 1	Hafizabad	Contact	Male	40	No		Contact							Refusal
RHC 10	Nankana Sahib	Contact	Male	17	No		Contact	Yes	NO		Abnormality not detected			TPT Eligible	NO
DHQ 1	Hafizabad	Contact	Male	21	No		Contact							Refusal
RHC 13	Nankana Sahib	Contact	Female	18	No		Contact	Yes	NO		Abnormality not detected			TPT Eligible	NO
RHC 10	Nankana Sahib	Contact	Female	18	No		Contact	Yes	NO		Abnormality not detected			TPT Eligible	NO
DHQ 2	Nankana Sahib	Contact	Female	18	No		Contact	Yes	NO		Abnormality not detected			TPT Eligible	NO
RHC 1	Hafizabad	Contact	Male	16	No		Contact							Refusal
RHC 13	Nankana Sahib	Contact	Female	7	No		Contact	Yes	NO					Refusal
THQ 2	Nankana Sahib	Contact	Male	10	No		Contact	Yes	NO					Refusal
RHC 3	Hafizabad	Contact	Male	18	No		Contact							Refusal
THQ 2	Nankana Sahib	Contact	Female	18	No		Contact							Loss to Follow up
RHC 13	Nankana Sahib	Contact	Male	19	No		Contact	Yes	NO		Abnormality not detected			TPT Eligible	NO
RHC 13	Nankana Sahib	Contact	Female	19	No		Contact	Yes	NO		Abnormality not detected			TPT Eligible	NO
RHC 4	Hafizabad	Contact	Male	25	No		Contact							Refusal
DHQ 2	Nankana Sahib	Contact	Male	40	No		Contact	Yes	NO					Refusal
RHC 5	Hafizabad	Contact	Male	3	No		Contact							Loss to Follow up
RHC 14	Nankana Sahib	Contact	Male	20	No		Contact	Yes	NO		Abnormality not detected			TPT Eligible	NO
THQ 1	Hafizabad	Contact	Female	20	No		Contact	Yes	NO		Abnormality not detected			TPT Eligible	NO
THQ 2	Nankana Sahib	Contact	Male	2	No		Contact	Yes	NO					Refusal
RHC 1	Hafizabad	Contact	Male	16	No		Contact							Refusal
RHC 13	Nankana Sahib	Contact	Male	21	No		Contact	Yes	NO		Abnormality not detected			TPT Eligible	NO
RHC 13	Nankana Sahib	Contact	Male	21	No		Contact	Yes	NO		Abnormality not detected			TPT Eligible	NO
RHC 10	Nankana Sahib	Contact	Male	5	No		Contact							Refusal
RHC 3	Nankana Sahib	Contact	Female	22	No		Contact	Yes	NO		Abnormality not detected			TPT Eligible	NO
DHQ 2	Nankana Sahib	Contact	Male	22	No		Contact	Yes	NO		Abnormality not detected			TPT Eligible	NO
RHC 8	Nankana Sahib	Contact	Female	22	No		Contact	Yes	NO		Abnormality not detected			TPT Eligible	NO
DHQ 2	Nankana Sahib	Contact	Male	22	No		Contact	Yes	NO		Abnormality not detected			TPT Eligible	NO
RHC 4	Hafizabad	Contact	Female	22	No		Contact	Yes	YES	current cough	Abnormality not detected		Smear Negative	TPT Eligible	NO
RHC 12	Nankana Sahib	Contact	Male	22	No		Contact	Yes	NO		Abnormality not detected			TPT Eligible	NO
RHC 13	Nankana Sahib	Contact	Male	23	No		Contact	Yes	NO		Abnormality not detected			TPT Eligible	NO
DHQ 2	Nankana Sahib	Contact	Male	3	No		Contact	Yes	NO					Refusal
DHQ 2	Nankana Sahib	Contact	Male	25	No		Contact	Yes	NO		Abnormality not detected			TPT Eligible	NO
RHC 3	Nankana Sahib	Contact	Female	25	No		Contact	Yes	NO		Abnormality not detected			TPT Eligible	NO
DHQ 2	Nankana Sahib	Contact	Female	25	No		Contact	Yes	NO		Abnormality not detected			TPT Eligible	NO
RHC 8	Nankana Sahib	Contact	Female	25	No		Contact	Yes	NO		Abnormality not detected			TPT Eligible	NO
RHC 14	Nankana Sahib	Contact	Male	40	No		Contact	Yes	NO					Refusal
RHC 2	Hafizabad	Contact	Male	4	No		Contact							Refusal
DHQ 2	Nankana Sahib	Contact	Male	2	No		Contact	Yes	NO					Refusal
THQ 2	Nankana Sahib	Contact	Male	8	No		Contact							Refusal
THQ 1	Hafizabad	Contact	Male	27	No		Contact	Yes	NO		Abnormality not detected			TPT Eligible	NO
THQ 1	Hafizabad	Contact	Female	27	No		Contact	Yes	NO		Abnormality not detected			TPT Eligible	NO
THQ 2	Nankana Sahib	Contact	Female	14	No		Contact	Yes	NO					Refusal
DHQ 2	Nankana Sahib	Contact	Female	28	No		Contact	Yes	NO		Abnormality not detected			TPT Eligible	NO
RHC 2	Hafizabad	Contact	Female	27	No		Contact							Refusal
THQ 1	Hafizabad	Contact	Male	29	No		Contact	Yes	NO		Abnormality not detected			TPT Eligible	NO
THQ 2	Nankana Sahib	Contact	Female	7	No		Contact	Yes	NO					Refusal
THQ 2	Nankana Sahib	Contact	Female	2	No		Contact	Yes	NO		Abnormality not detected			TPT Eligible	NO
DHQ 1	Hafizabad	Contact	Male	35	No		Contact	No	NO					Refusal
THQ 1	Hafizabad	Contact	Male	48	No		Contact							Refusal
DHQ 2	Nankana Sahib	Contact	Male	30	No		Contact	Yes	NO		Abnormality not detected			TPT Eligible	NO
RHC 14	Nankana Sahib	Contact	Female	30	No		Contact	Yes	NO		Abnormality not detected			TPT Eligible	NO
RHC 8	Nankana Sahib	Contact	Male	30	No		Contact	Yes	NO		Abnormality not detected			TPT Eligible	NO
DHQ 2	Nankana Sahib	Contact	Female	30	No		Contact	Yes	NO		Abnormality not detected			TPT Eligible	NO
RHC 14	Nankana Sahib	Contact	Male	11	No		Contact							Refusal
DHQ 1	Hafizabad	Contact	Female	25	No		Contact	No	NO					Refusal
RHC 3	Nankana Sahib	Contact	Female	32	No		Contact	Yes	NO		Abnormality not detected			TPT Eligible	NO
RHC 3	Hafizabad	Contact	Male	16	No		Contact							Refusal
RHC 3	Hafizabad	Contact	Male	33	No		Contact	Yes	NO		Abnormality not detected			TPT Eligible	NO
DHQ 2	Nankana Sahib	Contact	Male	34	No		Contact							Loss to Follow up
DHQ 2	Nankana Sahib	Contact	Female	35	No		Contact	Yes	NO		Abnormality not detected			TPT Eligible	NO
RHC 3	Hafizabad	Contact	Female	35	No		Contact	Yes	NO		Abnormality not detected			TPT Eligible	NO
RHC 1	Hafizabad	Contact	Male	11	No		Contact							Refusal
RHC 13	Nankana Sahib	Contact	Male	11	No		Contact	Yes	NO					Refusal
THQ 2	Nankana Sahib	Contact	Male	12	No		Contact	Yes	NO					Refusal
RHC 1	Hafizabad	Contact	Male	13	No		Contact							Refusal
DHQ 2	Nankana Sahib	Contact	Male	36	No		Contact	Yes	NO		Abnormality not detected			TPT Eligible	NO
RHC 8	Nankana Sahib	Contact	Female	36	No		Contact	Yes	NO		Abnormality not detected			TPT Eligible	NO
RHC 4	Hafizabad	Contact	Male	14	No		Contact	Yes	NO					Refusal
THQ 2	Nankana Sahib	Contact	Female	38	No		Contact							Loss to Follow up
DHQ 2	Nankana Sahib	Contact	Male	18	No		Contact	Yes	NO					Refusal
RHC 2	Hafizabad	Contact	Female	4	No		Contact	Yes	NO		Abnormality not detected			TPT Eligible	NO
DHQ 1	Hafizabad	Contact	Male	18	No		Contact							Refusal
THQ 2	Nankana Sahib	Contact	Male	40	No		Contact							Loss to Follow up
RHC 1	Hafizabad	Contact	Male	29	No		Contact							Refusal
RHC 1	Hafizabad	Contact	Male	30	No		Contact							Refusal
THQ 1	Hafizabad	Contact	Male	35	No		Contact							Refusal
DHQ 2	Nankana Sahib	Contact	Male	6	No		Contact							Refusal
RHC 13	Nankana Sahib	Contact	Female	45	No		Contact	Yes	NO		Abnormality not detected			TPT Eligible	NO
DHQ 2	Nankana Sahib	Contact	Female	47	No		Contact	Yes	NO		Abnormality not detected			TPT Eligible	NO
RHC 13	Nankana Sahib	Contact	Female	5	No		Contact	Yes	NO		Abnormality not detected			TPT Eligible	NO
DHQ 2	Nankana Sahib	Contact	Male	5	No		Contact	Yes	NO		Abnormality not detected			TPT Eligible	NO
RHC 1	Hafizabad	Contact	Male	8	No		Contact	No	NO					Refusal
DHQ 2	Nankana Sahib	Contact	Male	5	No		Contact							Loss to Follow up
RHC 1	Hafizabad	Contact	Male	9	No		Contact							Refusal
RHC 3	Nankana Sahib	Contact	Male	51	No		Contact	Yes	NO		Abnormality not detected			TPT Eligible	NO
RHC 1	Hafizabad	Contact	Male	9	No		Contact							Refusal
RHC 8	Nankana Sahib	Contact	Female	56	No		Contact	Yes	NO		Abnormality not detected			TPT Eligible	NO
RHC 12	Nankana Sahib	Contact	Female	58	No		Contact	Yes	YES	current cough	Abnormality not detected		Smear Negative	TPT Eligible	NO
DHQ 2	Nankana Sahib	Contact	Male	6	No		Contact							Loss to Follow up
RHC 12	Nankana Sahib	Contact	Male	60	No		Contact	Yes	NO		Abnormality not detected			TPT Eligible	NO
THQ 2	Nankana Sahib	Contact	Female	60	No		Contact							Loss to Follow up
RHC 14	Nankana Sahib	Contact	Male	18	No		Contact	Yes	NO					Refusal
DHQ 2	Nankana Sahib	Contact	Male	7	No		Contact	Yes	NO		Abnormality not detected			TPT Eligible	NO
RHC 4	Hafizabad	Contact	Male	7	No		Contact	Yes	NO		Abnormality not detected			TPT Eligible	NO
RHC 8	Nankana Sahib	Contact	Male	10	No		Contact	Yes	NO					Refusal
DHQ 2	Nankana Sahib	Contact	Male	14	No		Contact	Yes	NO					Refusal
RHC 14	Nankana Sahib	Contact	Male	12	No		Contact	Yes	NO					Refusal
DHQ 1	Hafizabad	Contact	Male	8	No		Contact	Yes	YES	current cough	Abnormality not detected	MTB not detected		TPT Eligible	NO
DHQ 1	Hafizabad	Contact	Male	8	No		Contact	Yes	NO		Abnormality not detected			TPT Eligible	NO
RHC 4	Hafizabad	Contact	Male	21	No		Contact							Refusal
DHQ 2	Nankana Sahib	Contact	Male	9	No		Contact	Yes	NO		Abnormality not detected			TPT Eligible	NO
DHQ 2	Nankana Sahib	Contact	Male	14	No		Contact							Refusal
RHC 14	Nankana Sahib	Contact	Male	25	No		Contact							Refusal
RHC 3	Nankana Sahib	Contact	Male	18	No		Contact	Yes	NO					Refusal
THQ 1	Hafizabad	Contact	Male	16	No		Contact							Refusal
RHC 1	Hafizabad	Contact	Female	10	No		Contact							Refusal
DHQ 1	Hafizabad	Contact	Female	0	Yes	6	Contact							Loss to Follow up
THQ 1	Hafizabad	Contact	Female	10	No		Contact							Refusal
THQ 1	Hafizabad	Contact	Female	18	No		Contact							Refusal
DHQ 1	Hafizabad	Contact	Male	10	No		Contact							Loss to Follow up
DHQ 2	Nankana Sahib	Contact	Female	20	No		Contact							Refusal
THQ 2	Nankana Sahib	Contact	Female	12	No		Contact	Yes	NO					Refusal
THQ 2	Nankana Sahib	Contact	Female	6	No		Contact							Refusal
RHC 1	Hafizabad	Contact	Female	14	No		Contact							Refusal
RHC 5	Hafizabad	Contact	Female	3	No		Contact							Refusal
DHQ 2	Nankana Sahib	Contact	Female	19	No		Contact	Yes	NO					Refusal
RHC 1	Hafizabad	Contact	Female	23	No		Contact							Refusal
THQ 1	Hafizabad	Contact	Female	30	No		Contact							Refusal
THQ 1	Hafizabad	Contact	Male	60	No		Contact							Refusal
DHQ 2	Nankana Sahib	Contact	Male	24	No		Contact	Yes	NO					Refusal
DHQ 2	Nankana Sahib	Contact	Male	60	No		Contact							Refusal
DHQ 2	Nankana Sahib	Contact	Male	65	No		Contact	Yes	NO					Refusal
THQ 1	Hafizabad	Contact	Male	70	No		Contact							Refusal
RHC 5	Hafizabad	Contact	Female	3	No		Contact							Refusal
DHQ 2	Nankana Sahib	Contact	Female	70	No		Contact							Refusal
RHC 14	Nankana Sahib	Contact	Male	40	No		Contact							Refusal
DHQ 2	Nankana Sahib	Contact	Male	30	No		Contact							Refusal
RHC 4	Hafizabad	Contact	Male	35	No		Contact							Refusal
THQ 1	Hafizabad	Contact	Female	7	No		Contact							Refusal
RHC 1	Hafizabad	Contact	Male	35	No		Contact							Refusal
THQ 2	Nankana Sahib	Contact	Male	40	No		Contact							Refusal
DHQ 2	Nankana Sahib	Contact	Male	3	No		Contact	Yes	NO					Refusal
RHC 1	Hafizabad	Contact	Female	10	No		Contact							Refusal
RHC 1	Hafizabad	Contact	Female	13	No		Contact							Refusal
DHQ 2	Nankana Sahib	Contact	Female	17	No		Contact	Yes	NO					Refusal
RHC 3	Hafizabad	Contact	Male	27	No		Contact							Refusal
RHC 3	Hafizabad	Contact	Male	40	No		Contact							Refusal
THQ 1	Hafizabad	Contact	Male	45	No		Contact							Refusal
DHQ 2	Nankana Sahib	Contact	Female	8	No		Contact	Yes	NO					Refusal
DHQ 2	Nankana Sahib	Contact	Female	10	No		Contact							Refusal
RHC 3	Hafizabad	Contact	Male	10	No		Contact
THQ 1	Hafizabad	Contact	Female	10	No		Contact							Loss to Follow up
THQ 2	Nankana Sahib	Contact	Female	10	No		Contact							Loss to Follow up
RHC 3	Hafizabad	Contact	Female	10	No		Contact	Yes	NO		Abnormality not detected			TPT Eligible	NO
RHC 5	Hafizabad	Contact	Male	10	No		Contact							Loss to Follow up
THQ 1	Hafizabad	Contact	Female	10	No		Contact							Loss to Follow up
RHC 12	Nankana Sahib	Contact	Female	10	No		Contact	Yes	NO		Abnormality not detected			TPT Eligible	NO
THQ 2	Nankana Sahib	Contact	Male	10	No		Contact	Yes	NO		Abnormality not detected			TPT Eligible	NO
DHQ 2	Nankana Sahib	Contact	Male	10	No		Contact							Loss to Follow up
RHC 1	Hafizabad	Contact	Male	10	No		Contact							Loss to Follow up
RHC 14	Nankana Sahib	Contact	Female	10	No		Contact	Yes	NO		Abnormality not detected			TPT Eligible	NO
DHQ 1	Hafizabad	Contact	Male	10	No		Contact	Yes	NO		Abnormality not detected			TPT Eligible	NO
RHC 10	Nankana Sahib	Contact	Female	10	No		Contact	Yes	NO		Abnormality not detected			TPT Eligible	NO
THQ 2	Nankana Sahib	Contact	Male	10	No		Contact							Loss to Follow up
THQ 2	Nankana Sahib	Contact	Male	10	No		Contact	Yes	NO		Abnormality not detected			TPT Eligible	NO
THQ 2	Nankana Sahib	Contact	Male	10	No		Contact							Loss to Follow up
RHC 5	Hafizabad	Contact	Male	10	No		Contact							Loss to Follow up
RHC 5	Hafizabad	Contact	Female	10	No		Contact							Loss to Follow up
THQ 1	Hafizabad	Contact	Male	10	No		Contact	Yes	NO		Abnormality not detected			TPT Eligible	NO
DHQ 1	Hafizabad	Contact	Male	10	No		Contact							Loss to Follow up
RHC 10	Nankana Sahib	Contact	Male	10	No		Contact	Yes	NO		Abnormality not detected			TPT Eligible	NO
DHQ 2	Nankana Sahib	Contact	Male	10	No		Contact							Loss to Follow up
RHC 5	Hafizabad	Contact	Female	10	No		Contact							Loss to Follow up
DHQ 2	Nankana Sahib	Contact	Male	10	No		Contact							Loss to Follow up
DHQ 2	Nankana Sahib	Contact	Female	10	No		Contact							Loss to Follow up
RHC 5	Hafizabad	Contact	Male	10	No		Contact							Loss to Follow up
DHQ 2	Nankana Sahib	Contact	Female	30	No		Contact							Refusal
RHC 14	Nankana Sahib	Contact	Female	22	No		Contact							Refusal
RHC 14	Nankana Sahib	Contact	Female	18	No		Contact	Yes	NO					Refusal
RHC 14	Nankana Sahib	Contact	Female	24	No		Contact							Refusal
DHQ 2	Nankana Sahib	Contact	Male	35	No		Contact	Yes	NO					Refusal
RHC 1	Hafizabad	Contact	Female	8	No		Contact							Refusal
THQ 1	Hafizabad	Contact	Male	3	No		Contact							Refusal
DHQ 2	Nankana Sahib	Contact	Male	30	No		Contact	Yes	NO					Refusal
RHC 3	Hafizabad	Contact	Female	15	No		Contact							Refusal
THQ 2	Nankana Sahib	Contact	Female	11	No		Contact	Yes	NO		Abnormality not detected			TPT Eligible	NO
DHQ 2	Nankana Sahib	Contact	Male	11	No		Contact							Loss to Follow up
DHQ 2	Nankana Sahib	Contact	Female	11	No		Contact							Loss to Follow up
DHQ 2	Nankana Sahib	Contact	Male	11	No		Contact							Loss to Follow up
RHC 5	Hafizabad	Contact	Male	11	No		Contact							Loss to Follow up
RHC 14	Nankana Sahib	Contact	Female	11	No		Contact	Yes	NO		Abnormality not detected			TPT Eligible	NO
DHQ 2	Nankana Sahib	Contact	Female	11	No		Contact							Loss to Follow up
DHQ 2	Nankana Sahib	Contact	Male	11	No		Contact							Loss to Follow up
RHC 11	Nankana Sahib	Contact	Female	11	No		Contact							Loss to Follow up
RHC 12	Nankana Sahib	Contact	Female	12	No		Contact	Yes	NO		Abnormality not detected			TPT Eligible	NO
RHC 2	Hafizabad	Index	Male	45
THQ 2	Nankana Sahib	Index	Male	45	No
DHQ 1	Hafizabad	Contact	Male	12	No		Contact							Loss to Follow up
RHC 3	Hafizabad	Contact	Male	11	No		Contact							Refusal
RHC 5	Hafizabad	Contact	Male	4	No		Contact							Refusal
RHC 14	Nankana Sahib	Contact	Male	9	No		Contact							Refusal
RHC 10	Nankana Sahib	Contact	Female	22	No		Contact							Refusal
RHC 2	Hafizabad	Contact	Female	0	Yes	8	Contact							Refusal
DHQ 1	Hafizabad	Contact	Female	13	No		Contact	No	NO					Refusal
THQ 1	Hafizabad	Contact	Female	33	No		Contact							Refusal
RHC 14	Nankana Sahib	Contact	Female	14	No		Contact	Yes	NO					Refusal
RHC 10	Nankana Sahib	Contact	Female	8	No		Contact	Yes	NO					Refusal
RHC 10	Nankana Sahib	Contact	Male	8	No		Contact							Refusal
RHC 14	Nankana Sahib	Contact	Female	6	No		Contact							Refusal
DHQ 1	Hafizabad	Contact	Male	20	No		Contact							Refusal
RHC 14	Nankana Sahib	Contact	Male	26	No		Contact	Yes	NO					Refusal
THQ 1	Hafizabad	Contact	Male	50	No		Contact							Refusal
RHC 1	Hafizabad	Contact	Male	20	No		Contact							Refusal
DHQ 1	Hafizabad	Contact	Male	13	No		Contact							Refusal
DHQ 1	Hafizabad	Contact	Male	14	No		Contact	No	NO					Refusal
DHQ 1	Hafizabad	Contact	Male	15	No		Contact	No	NO					Refusal
RHC 11	Nankana Sahib	Contact	Female	3	No		Contact	Yes	NO					Refusal
DHQ 2	Nankana Sahib	Contact	Female	18	No		Contact	Yes	NO					Refusal
RHC 9	Nankana Sahib	Contact	Male	45	No		Contact							Refusal
RHC 12	Nankana Sahib	Contact	Male	14	No		Contact	Yes	NO					Refusal
THQ 1	Hafizabad	Contact	Male	25	No		Contact							Refusal
DHQ 2	Nankana Sahib	Contact	Male	50	No		Contact							Refusal
RHC 3	Hafizabad	Contact	Male	90	No		Contact							Refusal
THQ 2	Nankana Sahib	Contact	Male	12	No		Contact							Loss to Follow up
THQ 2	Nankana Sahib	Contact	Female	28	No		Contact							Refusal
DHQ 2	Nankana Sahib	Contact	Female	35	No		Contact	Yes	NO					Refusal
DHQ 2	Nankana Sahib	Contact	Female	40	No		Contact	Yes	NO					Refusal
RHC 1	Hafizabad	Contact	Male	20	No		Contact							Refusal
DHQ 2	Nankana Sahib	Contact	Male	32	No		Contact							Refusal
RHC 3	Hafizabad	Contact	Male	35	No		Contact							Refusal
DHQ 2	Nankana Sahib	Contact	Female	12	No		Contact							Loss to Follow up
RHC 11	Nankana Sahib	Contact	Male	12	No		Contact	Yes	NO		Abnormality not detected			TPT Eligible	NO
RHC 11	Nankana Sahib	Contact	Female	12	No		Contact	Yes	NO		Abnormality not detected			TPT Eligible	NO
RHC 14	Nankana Sahib	Contact	Male	12	No		Contact	Yes	NO		Abnormality not detected			TPT Eligible	NO
THQ 2	Nankana Sahib	Contact	Female	12	No		Contact							Loss to Follow up
RHC 8	Nankana Sahib	Contact	Male	12	No		Contact	Yes	NO		Abnormality not detected			TPT Eligible	NO
RHC 1	Hafizabad	Contact	Female	12	No		Contact							Loss to Follow up
DHQ 2	Nankana Sahib	Contact	Male	12	No		Contact	Yes	YES	current cough	Abnormality not detected		Smear Negative	TPT Eligible	NO
DHQ 2	Nankana Sahib	Contact	Female	12	No		Contact							Loss to Follow up
DHQ 2	Nankana Sahib	Contact	Male	12	No		Contact							Loss to Follow up
DHQ 1	Hafizabad	Contact	Male	12	No		Contact							Loss to Follow up
RHC 5	Hafizabad	Contact	Male	12	No		Contact							Loss to Follow up
RHC 12	Nankana Sahib	Contact	Male	12	No		Contact	Yes	NO		Abnormality not detected			TPT Eligible	NO
THQ 1	Hafizabad	Contact	Female	12	No		Contact	Yes	NO		Abnormality not detected			TPT Eligible	NO
DHQ 2	Nankana Sahib	Contact	Female	12	No		Contact							Loss to Follow up
RHC 5	Hafizabad	Contact	Female	12	No		Contact							Loss to Follow up
THQ 2	Nankana Sahib	Contact	Female	12	No		Contact	No						Loss to Follow up
THQ 2	Nankana Sahib	Contact	Male	12	No		Contact	Yes	NO		Abnormality not detected			TPT Eligible	NO
DHQ 2	Nankana Sahib	Contact	Female	12	No		Contact							Loss to Follow up
RHC 14	Nankana Sahib	Contact	Female	12	No		Contact	Yes	NO		Abnormality not detected			TPT Eligible	NO
RHC 1	Hafizabad	Index	Male	45	No
RHC 10	Nankana Sahib	Index	Male	45	No
DHQ 2	Nankana Sahib	Contact	Male	35	No		Contact							Refusal
RHC 9	Nankana Sahib	Contact	Male	5	No		Contact	Yes	NO					Refusal
RHC 9	Nankana Sahib	Contact	Male	40	No		Contact							Refusal
RHC 14	Nankana Sahib	Contact	Male	48	No		Contact							Refusal
RHC 12	Nankana Sahib	Contact	Male	9	No		Contact	Yes	NO					Refusal
THQ 1	Hafizabad	Contact	Male	30	No		Contact							Refusal
RHC 1	Hafizabad	Contact	Female	32	No		Contact							Refusal
DHQ 2	Nankana Sahib	Contact	Female	15	No		Contact							Refusal
THQ 2	Nankana Sahib	Contact	Female	17	No		Contact	Yes	NO					Refusal
RHC 1	Hafizabad	Contact	Female	17	No		Contact	No						Refusal
RHC 3	Nankana Sahib	Contact	Female	20	No		Contact	Yes	NO					Refusal
THQ 1	Hafizabad	Contact	Male	30	No		Contact							Refusal
RHC 1	Hafizabad	Contact	Male	34	No		Contact	No	NO					Refusal
RHC 1	Hafizabad	Contact	Male	4	No		Contact							Refusal
RHC 1	Hafizabad	Contact	Male	12	No		Contact							Refusal
RHC 3	Hafizabad	Contact	Male	20	No		Contact							Refusal
THQ 2	Nankana Sahib	Contact	Female	13	No		Contact							Loss to Follow up
RHC 9	Nankana Sahib	Contact	Male	13	No		Contact							Loss to Follow up
DHQ 1	Hafizabad	Contact	Female	13	No		Contact							Loss to Follow up
THQ 2	Nankana Sahib	Contact	Male	13	No		Contact							Loss to Follow up
DHQ 2	Nankana Sahib	Contact	Male	13	No		Contact							Loss to Follow up
THQ 2	Nankana Sahib	Contact	Female	13	No		Contact	Yes	NO		Abnormality not detected			TPT Eligible	NO
RHC 2	Hafizabad	Contact	Female	13	No		Contact							Loss to Follow up
THQ 2	Nankana Sahib	Contact	Male	13	No		Contact	Yes	NO		Abnormality not detected			TPT Eligible	NO
RHC 5	Hafizabad	Contact	Male	13	No		Contact							Loss to Follow up
RHC 12	Nankana Sahib	Contact	Male	13	No		Contact	Yes	NO		Abnormality not detected			TPT Eligible	NO
DHQ 1	Hafizabad	Contact	Female	13	No		Contact							Loss to Follow up
DHQ 2	Nankana Sahib	Contact	Female	13	No		Contact							Loss to Follow up
THQ 2	Nankana Sahib	Contact	Female	13	No		Contact							Loss to Follow up
DHQ 1	Hafizabad	Contact	Female	13	No		Contact	No						Loss to Follow up
THQ 2	Nankana Sahib	Contact	Female	14	No		Contact							Loss to Follow up
THQ 2	Nankana Sahib	Contact	Female	5	No		Contact	Yes	NO					Refusal
RHC 14	Nankana Sahib	Contact	Male	55	No		Contact							Refusal
RHC 1	Hafizabad	Contact	Female	1			Contact							Refusal
RHC 5	Hafizabad	Contact	Female	4	No		Contact							Refusal
RHC 1	Hafizabad	Contact	Female	3	No		Contact							Refusal
DHQ 2	Nankana Sahib	Contact	Female	12	No		Contact	Yes	NO					Refusal
THQ 2	Nankana Sahib	Contact	Female	15	No		Contact	Yes	NO					Refusal
DHQ 2	Nankana Sahib	Contact	Female	17	No		Contact	Yes	NO					Refusal
THQ 2	Nankana Sahib	Contact	Female	18	No		Contact	Yes	NO					Refusal
RHC 1	Hafizabad	Contact	Female	19	No		Contact	No						Refusal
DHQ 2	Nankana Sahib	Contact	Female	20	No		Contact							Refusal
DHQ 2	Nankana Sahib	Contact	Female	5	No		Contact							Refusal
DHQ 2	Nankana Sahib	Contact	Female	7	No		Contact	Yes	NO					Refusal
RHC 1	Hafizabad	Contact	Male	6	No		Contact							Refusal
RHC 3	Nankana Sahib	Contact	Female	4	No		Contact	Yes	NO					Refusal
RHC 3	Nankana Sahib	Contact	Female	5	No		Contact	Yes	NO					Refusal
RHC 3	Nankana Sahib	Contact	Female	13	No		Contact	Yes	NO					Refusal
RHC 1	Hafizabad	Contact	Male	7	No		Contact							Refusal
RHC 3	Hafizabad	Contact	Male	25	No		Contact							Refusal
RHC 14	Nankana Sahib	Contact	Male	8	No		Contact							Refusal
RHC 1	Hafizabad	Contact	Male	35	No		Contact							Refusal
RHC 10	Nankana Sahib	Contact	Female	60	No		Contact							Refusal
THQ 2	Nankana Sahib	Contact	Female	53	No		Contact	Yes	NO					Refusal
THQ 2	Nankana Sahib	Contact	Male	14	No		Contact							Loss to Follow up
RHC 5	Hafizabad	Contact	Male	14	No		Contact							Loss to Follow up
RHC 3	Nankana Sahib	Contact	Male	14	No		Contact	Yes	NO		Abnormality not detected			TPT Eligible	NO
THQ 2	Nankana Sahib	Contact	Male	14	No		Contact							Loss to Follow up
RHC 3	Hafizabad	Contact	Male	14	No		Contact	Yes	NO		Abnormality not detected			TPT Eligible	NO
DHQ 2	Nankana Sahib	Contact	Male	14	No		Contact							Loss to Follow up
DHQ 2	Nankana Sahib	Contact	Male	14	No		Contact							Loss to Follow up
THQ 2	Nankana Sahib	Contact	Female	14	No		Contact							Loss to Follow up
DHQ 1	Hafizabad	Contact	Female	14	No		Contact							Loss to Follow up
DHQ 2	Nankana Sahib	Contact	Female	14	No		Contact							Loss to Follow up
RHC 8	Nankana Sahib	Contact	Female	14	No		Contact	Yes	NO		Abnormality not detected			TPT Eligible	NO
RHC 1	Hafizabad	Contact	Female	14	No		Contact							Loss to Follow up
RHC 8	Nankana Sahib	Contact	Male	14	No		Contact	Yes	NO		Abnormality not detected			TPT Eligible	NO
DHQ 1	Hafizabad	Contact	Female	14	No		Contact							Loss to Follow up
RHC 13	Nankana Sahib	Contact	Male	14	No		Contact	Yes	NO		Abnormality not detected			TPT Eligible	NO
RHC 5	Hafizabad	Contact	Male	14	No		Contact							Loss to Follow up
RHC 8	Nankana Sahib	Contact	Male	14	No		Contact	Yes	NO		Abnormality not detected			TPT Eligible	NO
THQ 2	Nankana Sahib	Contact	Male	14	No		Contact							Loss to Follow up
DHQ 2	Nankana Sahib	Contact	Female	14	No		Contact							Loss to Follow up
DHQ 2	Nankana Sahib	Contact	Female	14	No		Contact							Loss to Follow up
RHC 10	Nankana Sahib	Contact	Male	14	No		Contact	Yes	NO		Abnormality not detected			TPT Eligible	NO
RHC 11	Nankana Sahib	Contact	Male	14	No		Contact							Loss to Follow up
DHQ 1	Hafizabad	Contact	Male	14	No		Contact	Yes	NO		Abnormality not detected			TPT Eligible	NO
DHQ 2	Nankana Sahib	Contact	Female	14	No		Contact							Loss to Follow up
RHC 12	Nankana Sahib	Contact	Female	15	No		Contact	Yes	NO		Abnormality not detected			TPT Eligible	NO
RHC 14	Nankana Sahib	Contact	Male	15	No		Contact	Yes	NO		Abnormality not detected			TPT Eligible	NO
THQ 2	Nankana Sahib	Contact	Female	15	No		Contact	Yes	NO		Abnormality not detected			TPT Eligible	NO
THQ 2	Nankana Sahib	Contact	Male	20	No		Contact							Refusal
RHC 8	Nankana Sahib	Contact	Male	4	No		Contact	Yes	NO					Refusal
RHC 3	Hafizabad	Contact	Male	7	No		Contact							Refusal
RHC 1	Hafizabad	Contact	Female	45	No		Contact							Refusal
RHC 3	Hafizabad	Contact	Female	34	No		Contact							Refusal
THQ 1	Hafizabad	Contact	Male	15	No		Contact							Loss to Follow up
DHQ 2	Nankana Sahib	Contact	Female	42	No		Contact	Yes	NO					Refusal
THQ 2	Nankana Sahib	Contact	Female	45	No		Contact	Yes	NO					Refusal
RHC 1	Hafizabad	Contact	Male	6	No		Contact							Refusal
RHC 10	Nankana Sahib	Contact	Female	5	No		Contact	Yes	NO					Refusal
THQ 2	Nankana Sahib	Contact	Male	23	No		Contact	Yes	NO					Refusal
THQ 2	Nankana Sahib	Contact	Male	40	No		Contact	Yes	NO					Refusal
THQ 2	Nankana Sahib	Contact	Male	65	No		Contact	Yes	NO					Refusal
RHC 2	Hafizabad	Contact	Male	70	No		Contact							Refusal
THQ 1	Hafizabad	Contact	Female	50	No		Contact							Refusal
RHC 5	Hafizabad	Contact	Female	7	No		Contact							Refusal
DHQ 1	Hafizabad	Contact	Female	40	No		Contact							Refusal
RHC 5	Hafizabad	Contact	Female	15	No		Contact							Refusal
RHC 8	Nankana Sahib	Contact	Female	3	No		Contact	Yes	NO					Refusal
DHQ 2	Nankana Sahib	Contact	Male	12	No		Contact							Refusal
RHC 5	Hafizabad	Contact	Male	15	No		Contact							Refusal
DHQ 1	Hafizabad	Contact	Male	17	No		Contact							Refusal
RHC 4	Hafizabad	Contact	Male	30	No		Contact							Refusal
RHC 8	Nankana Sahib	Contact	Male	6	No		Contact	Yes	NO					Refusal
RHC 5	Hafizabad	Contact	Male	20	No		Contact							Refusal
RHC 5	Hafizabad	Contact	Female	30	No		Contact							Refusal
RHC 5	Hafizabad	Contact	Male	15	No		Contact							Refusal
RHC 11	Nankana Sahib	Contact	Male	15	No		Contact	Yes	NO					Refusal
RHC 2	Hafizabad	Contact	Female	1			Contact							Refusal
RHC 4	Hafizabad	Contact	Male	55	No		Contact	No	NO					Refusal
THQ 2	Nankana Sahib	Contact	Male	12	No		Contact	Yes	NO					Refusal
RHC 5	Hafizabad	Contact	Male	22	No		Contact							Refusal
DHQ 2	Nankana Sahib	Contact	Female	21	No		Contact	Yes	NO					Refusal
RHC 5	Hafizabad	Contact	Female	1	No		Contact							Refusal
RHC 3	Nankana Sahib	Contact	Female	15	No		Contact	Yes	YES	current cough	Abnormality not detected		Smear Negative	TPT Eligible	NO
THQ 2	Nankana Sahib	Contact	Male	15	No		Contact							Loss to Follow up
RHC 14	Nankana Sahib	Contact	Female	15	No		Contact	Yes	NO		Abnormality not detected			TPT Eligible	NO
DHQ 2	Nankana Sahib	Contact	Male	15	No		Contact							Loss to Follow up
RHC 9	Nankana Sahib	Contact	Male	15	No		Contact	Yes	NO		Abnormality not detected			TPT Eligible	NO
RHC 14	Nankana Sahib	Contact	Male	15	No		Contact	Yes	NO		Abnormality not detected			TPT Eligible	NO
RHC 1	Hafizabad	Contact	Male	15	No		Contact							Loss to Follow up
RHC 1	Hafizabad	Contact	Female	15	No		Contact							Loss to Follow up
THQ 2	Nankana Sahib	Contact	Female	15	No		Contact							Loss to Follow up
THQ 2	Nankana Sahib	Contact	Female	15	No		Contact	Yes	NO		Abnormality not detected			TPT Eligible	NO
RHC 2	Hafizabad	Contact	Male	15	No		Contact							Loss to Follow up
RHC 14	Nankana Sahib	Contact	Male	15	No		Contact	Yes	NO		Abnormality not detected			TPT Eligible	NO
RHC 5	Hafizabad	Contact	Female	15	No		Contact							Loss to Follow up
RHC 14	Nankana Sahib	Contact	Male	15	No		Contact	Yes	NO		Abnormality not detected			TPT Eligible	NO
RHC 4	Hafizabad	Contact	Female	15	No		Contact	Yes	NO		Abnormality not detected			TPT Eligible	NO
RHC 5	Hafizabad	Contact	Male	15	No		Contact							Loss to Follow up
RHC 9	Nankana Sahib	Contact	Female	15	No		Contact	Yes	NO		Abnormality not detected			TPT Eligible	NO
DHQ 2	Nankana Sahib	Contact	Male	15	No		Contact							Loss to Follow up
RHC 5	Hafizabad	Contact	Female	15	No		Contact							Loss to Follow up
THQ 2	Nankana Sahib	Contact	Female	15	No		Contact							Loss to Follow up
THQ 2	Nankana Sahib	Contact	Male	15	No		Contact	Yes	NO		Abnormality not detected			TPT Eligible	NO
RHC 9	Nankana Sahib	Index	Male	45	No
RHC 14	Nankana Sahib	Contact	Female	16	No		Contact	Yes	NO		Abnormality not detected			TPT Eligible	NO
THQ 2	Nankana Sahib	Contact	Female	16	No		Contact	No						Loss to Follow up
RHC 7	Hafizabad	Contact	Female	16	No		Contact	No	NO					Loss to Follow up
RHC 9	Nankana Sahib	Contact	Male	16	No		Contact	Yes	NO		Abnormality not detected			TPT Eligible	NO
RHC 4	Hafizabad	Contact	Male	16	No		Contact	Yes	NO		Abnormality not detected			TPT Eligible	NO
THQ 1	Hafizabad	Contact	Female	16	No		Contact							Loss to Follow up
THQ 2	Nankana Sahib	Contact	Male	16	No		Contact							Loss to Follow up
RHC 5	Hafizabad	Contact	Female	5	No		Contact							Refusal
RHC 14	Nankana Sahib	Contact	Female	3	No		Contact	Yes	NO					Refusal
RHC 1	Hafizabad	Contact	Male	65	No		Contact	No	NO					Refusal
RHC 10	Nankana Sahib	Contact	Male	6	No		Contact	Yes	NO					Refusal
THQ 2	Nankana Sahib	Contact	Male	12	No		Contact							Refusal
RHC 1	Hafizabad	Contact	Female	5	No		Contact							Refusal
RHC 8	Nankana Sahib	Contact	Female	8	No		Contact	Yes	NO					Refusal
RHC 1	Hafizabad	Contact	Male	0	Yes	10 Month	Contact							Refusal
RHC 5	Hafizabad	Contact	Female	18	No		Contact							Refusal
DHQ 2	Nankana Sahib	Contact	Female	10	No		Contact							Refusal
RHC 11	Nankana Sahib	Contact	Female	2	No		Contact	Yes	NO					Refusal
RHC 3	Nankana Sahib	Contact	Female	8	No		Contact	Yes	NO					Refusal
THQ 2	Nankana Sahib	Contact	Male	12	No		Contact	Yes	NO					Refusal
DHQ 1	Hafizabad	Contact	Male	12	No		Contact							Refusal
RHC 5	Hafizabad	Contact	Male	15	No		Contact							Refusal
DHQ 2	Nankana Sahib	Contact	Male	17	No		Contact	Yes	NO					Refusal
THQ 2	Nankana Sahib	Contact	Male	4	No		Contact							Refusal
RHC 8	Nankana Sahib	Contact	Male	15	No		Contact	Yes	NO					Refusal
RHC 1	Hafizabad	Contact	Female	17	No		Contact							Refusal
RHC 5	Hafizabad	Contact	Female	2	No		Contact							Refusal
THQ 1	Hafizabad	Contact	Female	16	No		Contact							Loss to Follow up
RHC 5	Hafizabad	Contact	Female	16	No		Contact							Loss to Follow up
THQ 2	Nankana Sahib	Contact	Male	16	No		Contact							Loss to Follow up
DHQ 2	Nankana Sahib	Contact	Male	16	No		Contact							Loss to Follow up
RHC 3	Hafizabad	Contact	Male	16	No		Contact	Yes	NO		Abnormality not detected			TPT Eligible	NO
RHC 11	Nankana Sahib	Contact	Female	16	No		Contact	Yes	NO		Abnormality not detected			TPT Eligible	NO
THQ 2	Nankana Sahib	Contact	Female	16	No		Contact							Loss to Follow up
RHC 1	Hafizabad	Contact	Female	16	No		Contact							Loss to Follow up
RHC 9	Nankana Sahib	Contact	Female	16	No		Contact	Yes	NO		Abnormality not detected			TPT Eligible	NO
RHC 12	Nankana Sahib	Contact	Female	16	No		Contact	Yes	NO		Abnormality not detected			TPT Eligible	NO
THQ 1	Hafizabad	Contact	Female	16	No		Contact	Yes	NO		Abnormality not detected			TPT Eligible	NO
THQ 2	Nankana Sahib	Contact	Male	16	No		Contact	Yes	NO		Abnormality not detected			TPT Eligible	NO
RHC 11	Nankana Sahib	Contact	Male	16	No		Contact	Yes	NO		Abnormality not detected			TPT Eligible	NO
RHC 3	Nankana Sahib	Contact	Female	16	No		Contact	Yes	YES	current cough	Abnormality Detected	MTB not detected	Smear Negative	TB Patient
RHC 14	Nankana Sahib	Contact	Female	16	No		Contact	Yes	NO		Abnormality not detected			TPT Eligible	NO
DHQ 1	Hafizabad	Contact	Female	16	No		Contact							Loss to Follow up
DHQ 1	Hafizabad	Contact	Female	16	No		Contact	No						Loss to Follow up
RHC 2	Hafizabad	Contact	Male	34	No		Contact	Yes	YES	current cough	Abnormality not detected		Smear Negative	TPT Eligible	YES	Married	10	3HP (weekly)	Completed
DHQ 1	Hafizabad	Contact	Male	16	No		Contact	Yes	NO		Abnormality not detected			TPT Eligible	NO
DHQ 2	Nankana Sahib	Contact	Male	16	No		Contact							Loss to Follow up
RHC 3	Hafizabad	Index	Male	45	No
RHC 2	Hafizabad	Index	Male	45	No
RHC 1	Hafizabad	Index	Female	45	No
RHC 3	Hafizabad	Index	Female	45	No
RHC 5	Hafizabad	Contact	Male	17	No		Contact							Loss to Follow up
RHC 5	Hafizabad	Contact	Female	17	No		Contact							Loss to Follow up
THQ 2	Nankana Sahib	Contact	Male	3	No		Contact	Yes	NO					Refusal
THQ 1	Hafizabad	Contact	Female	14	No		Contact							Refusal
THQ 1	Hafizabad	Contact	Female	45	No		Contact							Refusal
RHC 1	Hafizabad	Contact	Female	38	No		Contact							Refusal
THQ 2	Nankana Sahib	Contact	Female	60	No		Contact							Refusal
RHC 1	Hafizabad	Contact	Female	60	No		Contact							Refusal
DHQ 2	Nankana Sahib	Contact	Female	10	No		Contact							Refusal
DHQ 2	Nankana Sahib	Contact	Female	16	No		Contact	Yes	NO					Refusal
THQ 2	Nankana Sahib	Contact	Female	19	No		Contact							Refusal
THQ 1	Hafizabad	Contact	Female	3	No		Contact							Refusal
THQ 1	Hafizabad	Contact	Female	60	No		Contact							Refusal
RHC 3	Nankana Sahib	Contact	Female	14	No		Contact	Yes	NO					Refusal
RHC 13	Nankana Sahib	Contact	Female	16	No		Contact	Yes	NO					Refusal
DHQ 2	Nankana Sahib	Contact	Male	40	No		Contact							Refusal
DHQ 2	Nankana Sahib	Contact	Female	40	No		Contact	Yes	NO					Refusal
THQ 2	Nankana Sahib	Contact	Male	17	No		Contact	Yes	YES	current cough	Abnormality not detected		Smear Negative	TB Patient
DHQ 2	Nankana Sahib	Contact	Male	28	No		Contact	Yes	NO					Refusal
RHC 1	Hafizabad	Contact	Male	20	No		Contact							Refusal
RHC 5	Hafizabad	Contact	Male	17	No		Contact							Loss to Follow up
THQ 2	Nankana Sahib	Contact	Male	17	No		Contact	Yes	NO		Abnormality not detected			TPT Eligible	NO
DHQ 2	Nankana Sahib	Contact	Male	17	No		Contact							Loss to Follow up
DHQ 2	Nankana Sahib	Contact	Male	17	No		Contact							Loss to Follow up
RHC 9	Nankana Sahib	Contact	Male	17	No		Contact							Loss to Follow up
DHQ 1	Hafizabad	Contact	Female	17	No		Contact	No	NO					Loss to Follow up
DHQ 1	Hafizabad	Contact	Male	17	No		Contact							Loss to Follow up
RHC 1	Hafizabad	Contact	Male	17	No		Contact							Loss to Follow up
DHQ 1	Hafizabad	Contact	Male	17	No		Contact							Loss to Follow up
THQ 1	Hafizabad	Contact	Male	17	No		Contact	Yes	NO		Abnormality not detected			TPT Eligible	NO
RHC 5	Hafizabad	Contact	Male	17	No		Contact							Loss to Follow up
RHC 9	Nankana Sahib	Contact	Male	17	No		Contact	Yes	NO		Abnormality not detected			TPT Eligible	NO
RHC 14	Nankana Sahib	Contact	Female	17	No		Contact	Yes	NO		Abnormality not detected			TPT Eligible	NO
RHC 14	Nankana Sahib	Contact	Male	17	No		Contact	Yes	NO		Abnormality not detected			TPT Eligible	NO
THQ 2	Nankana Sahib	Contact	Male	17	No		Contact							Loss to Follow up
DHQ 1	Hafizabad	Contact	Male	17	No		Contact	Yes	NO		Abnormality not detected			TPT Eligible	NO
RHC 1	Hafizabad	Index	Male	18	No
RHC 3	Hafizabad	Index	Female	18	No
RHC 5	Hafizabad	Contact	Male	18	No		Contact							Loss to Follow up
DHQ 2	Nankana Sahib	Contact	Male	18	No		Contact							Loss to Follow up
RHC 10	Nankana Sahib	Contact	Male	18	No		Contact	Yes	NO		Abnormality not detected			TPT Eligible	NO
RHC 14	Nankana Sahib	Contact	Female	18	No		Contact							Loss to Follow up
THQ 2	Nankana Sahib	Contact	Female	18	No		Contact	Yes	NO		Abnormality not detected			TPT Eligible	NO
RHC 14	Nankana Sahib	Contact	Female	18	No		Contact							Loss to Follow up
DHQ 2	Nankana Sahib	Contact	Male	18	No		Contact							Loss to Follow up
THQ 2	Nankana Sahib	Contact	Male	18	No		Contact							Loss to Follow up
RHC 12	Nankana Sahib	Contact	Male	18	No		Contact	Yes	NO		Abnormality not detected			TPT Eligible	NO
RHC 3	Nankana Sahib	Contact	Female	18	No		Contact	Yes	NO		Abnormality not detected			TPT Eligible	NO
RHC 5	Hafizabad	Contact	Female	28	No		Contact							Refusal
THQ 1	Hafizabad	Contact	Female	28	No		Contact							Refusal
THQ 1	Hafizabad	Contact	Male	18	No		Contact							Loss to Follow up
DHQ 1	Hafizabad	Contact	Male	13	No		Contact	No	NO					Refusal
THQ 2	Nankana Sahib	Contact	Male	38	No		Contact	Yes	NO					Refusal
RHC 1	Hafizabad	Contact	Female	36	No		Contact							Refusal
RHC 1	Hafizabad	Contact	Female	15	No		Contact							Refusal
RHC 1	Hafizabad	Contact	Male	25	No		Contact							Refusal
THQ 1	Hafizabad	Contact	Female	30	No		Contact							Refusal
RHC 1	Hafizabad	Contact	Male	40	No		Contact							Refusal
RHC 1	Hafizabad	Contact	Male	50	No		Contact							Refusal
RHC 1	Hafizabad	Contact	Male	58	No		Contact							Refusal
RHC 1	Hafizabad	Contact	Female	65	No		Contact							Refusal
THQ 2	Nankana Sahib	Contact	Male	35	No		Contact							Refusal
THQ 2	Nankana Sahib	Contact	Male	10	No		Contact							Refusal
RHC 14	Nankana Sahib	Contact	Male	12	No		Contact	Yes	NO					Refusal
RHC 1	Hafizabad	Contact	Female	17	No		Contact							Refusal
RHC 5	Hafizabad	Contact	Female	11	No		Contact							Refusal
RHC 13	Nankana Sahib	Contact	Female	12	No		Contact	Yes	NO					Refusal
RHC 5	Hafizabad	Contact	Female	12	No		Contact							Refusal
DHQ 2	Nankana Sahib	Contact	Male	60	No		Contact	Yes	NO					Refusal
RHC 11	Nankana Sahib	Contact	Male	9	No		Contact							Refusal
RHC 5	Hafizabad	Contact	Female	15	No		Contact							Refusal
DHQ 2	Nankana Sahib	Contact	Male	18	No		Contact							Loss to Follow up
THQ 2	Nankana Sahib	Contact	Male	8	No		Contact	Yes	NO					Refusal
THQ 2	Nankana Sahib	Contact	Male	18	No		Contact							Loss to Follow up
DHQ 2	Nankana Sahib	Contact	Male	18	No		Contact							Loss to Follow up
DHQ 2	Nankana Sahib	Contact	Female	16	No		Contact	Yes	NO					Refusal
RHC 3	Hafizabad	Contact	Female	60	No		Contact							Refusal
RHC 1	Hafizabad	Contact	Male	8	No		Contact							Refusal
THQ 2	Nankana Sahib	Contact	Male	75	No		Contact	Yes	NO					Refusal
DHQ 1	Hafizabad	Contact	Male	12	No		Contact							Refusal
THQ 1	Hafizabad	Contact	Male	21	No		Contact							Refusal
RHC 5	Hafizabad	Contact	Female	18	No		Contact							Loss to Follow up
RHC 1	Hafizabad	Contact	Male	18	No		Contact							Loss to Follow up
DHQ 1	Hafizabad	Contact	Male	18	No		Contact							Loss to Follow up
THQ 2	Nankana Sahib	Contact	Female	18	No		Contact							Loss to Follow up
RHC 5	Hafizabad	Contact	Male	18	No		Contact							Loss to Follow up
DHQ 1	Hafizabad	Contact	Female	18	No		Contact							Loss to Follow up
RHC 9	Nankana Sahib	Contact	Female	18	No		Contact	Yes	NO		Abnormality not detected			TPT Eligible	NO
DHQ 2	Nankana Sahib	Contact	Male	18	No		Contact	Yes	NO		Abnormality not detected			TPT Eligible	NO
RHC 12	Nankana Sahib	Contact	Female	18	No		Contact	Yes	NO		Abnormality not detected			TPT Eligible	NO
DHQ 1	Hafizabad	Contact	Male	18	No		Contact	Yes	NO		Abnormality not detected			TPT Eligible	NO
THQ 2	Nankana Sahib	Contact	Male	18	No		Contact							Loss to Follow up
RHC 8	Nankana Sahib	Contact	Female	18	No		Contact	Yes	NO		Abnormality not detected			TPT Eligible	NO
THQ 2	Nankana Sahib	Contact	Male	18	No		Contact	Yes	NO		Abnormality not detected			TPT Eligible	NO
RHC 2	Hafizabad	Contact	Female	18	No		Contact							Loss to Follow up
RHC 2	Hafizabad	Contact	Male	18	No		Contact							Loss to Follow up
RHC 11	Nankana Sahib	Contact	Female	18	No		Contact	Yes	NO		Abnormality not detected			TPT Eligible	NO
RHC 12	Nankana Sahib	Contact	Male	18	No		Contact	Yes	NO		Abnormality not detected			TPT Eligible	NO
THQ 1	Hafizabad	Contact	Female	18	No		Contact	Yes	NO		Abnormality not detected			TPT Eligible	NO
RHC 3	Nankana Sahib	Contact	Male	18	No		Contact							Loss to Follow up
RHC 4	Hafizabad	Contact	Male	18	No		Contact	Yes	NO		Abnormality not detected			TPT Eligible	NO
RHC 5	Hafizabad	Contact	Male	18	No		Contact							Loss to Follow up
THQ 2	Nankana Sahib	Contact	Male	18	No		Contact							Loss to Follow up
RHC 12	Nankana Sahib	Contact	Male	18	No		Contact	Yes	NO		Abnormality not detected			TPT Eligible	NO
RHC 11	Nankana Sahib	Contact	Female	18	No		Contact	Yes	NO		Abnormality not detected			TPT Eligible	NO
DHQ 2	Nankana Sahib	Contact	Male	18	No		Contact							Loss to Follow up
THQ 2	Nankana Sahib	Contact	Female	18	No		Contact							Loss to Follow up
RHC 11	Nankana Sahib	Contact	Male	18	No		Contact							Loss to Follow up
DHQ 2	Nankana Sahib	Contact	Male	18	No		Contact							Loss to Follow up
RHC 11	Nankana Sahib	Contact	Male	18	No		Contact	Yes	NO		Abnormality not detected			TPT Eligible	NO
DHQ 2	Nankana Sahib	Contact	Female	18	No		Contact							Loss to Follow up
THQ 2	Nankana Sahib	Contact	Male	18	No		Contact							Loss to Follow up
THQ 2	Nankana Sahib	Contact	Male	18	No		Contact	Yes	NO		Abnormality not detected			TPT Eligible	NO
THQ 2	Nankana Sahib	Contact	Female	18	No		Contact							Loss to Follow up
RHC 3	Hafizabad	Index	Female	19	No
RHC 4	Hafizabad	Index	Female	19	No
RHC 10	Nankana Sahib	Index	Male	19	No
RHC 1	Hafizabad	Index	Male	19	No
THQ 2	Nankana Sahib	Contact	Male	19	No		Contact	Yes	NO		Abnormality not detected			TPT Eligible	NO
RHC 3	Nankana Sahib	Contact	Male	19	No		Contact	Yes	YES	current cough	Abnormality Detected	MTB detected	Smear Positive	TB Patient
DHQ 2	Nankana Sahib	Contact	Female	19	No		Contact	Yes	YES	current cough	Abnormality Detected		Smear Negative	TPT Eligible	NO
THQ 2	Nankana Sahib	Contact	Male	19	No		Contact	Yes	NO		Abnormality not detected			TPT Eligible	NO
RHC 11	Nankana Sahib	Contact	Male	2	No		Contact							Refusal
RHC 1	Hafizabad	Contact	Female	21	No		Contact							Refusal
DHQ 1	Hafizabad	Contact	Female	7	No		Contact							Refusal
THQ 2	Nankana Sahib	Contact	Male	4	No		Contact	Yes	NO					Refusal
DHQ 2	Nankana Sahib	Contact	Female	75	No		Contact							Refusal
DHQ 1	Hafizabad	Contact	Male	22	No		Contact							Refusal
RHC 8	Nankana Sahib	Contact	Male	19	No		Contact	Yes	NO					Refusal
RHC 1	Hafizabad	Contact	Female	26	No		Contact							Refusal
RHC 1	Hafizabad	Contact	Female	20	No		Contact							Refusal
DHQ 1	Hafizabad	Contact	Female	20	No		Contact							Refusal
THQ 2	Nankana Sahib	Contact	Female	25	No		Contact	Yes	NO					Refusal
RHC 1	Hafizabad	Contact	Female	30	No		Contact							Refusal
RHC 11	Nankana Sahib	Contact	Female	0	Yes	6	Contact							Refusal
DHQ 2	Nankana Sahib	Contact	Male	6	No		Contact	Yes	NO					Refusal
RHC 1	Hafizabad	Contact	Male	19	No		Contact							Loss to Follow up
RHC 4	Hafizabad	Contact	Female	19	No		Contact	Yes	NO		Abnormality not detected			TPT Eligible	NO
RHC 9	Nankana Sahib	Contact	Male	19	No		Contact	Yes	NO		Abnormality not detected			TPT Eligible	NO
RHC 3	Nankana Sahib	Contact	Male	19	No		Contact							Loss to Follow up
RHC 2	Hafizabad	Contact	Female	19	No		Contact							Loss to Follow up
RHC 1	Hafizabad	Contact	Male	19	No		Contact							Loss to Follow up
DHQ 2	Nankana Sahib	Contact	Female	19	No		Contact	Yes	NO		Abnormality not detected			TPT Eligible	NO
RHC 5	Hafizabad	Contact	Male	19	No		Contact							Loss to Follow up
RHC 12	Nankana Sahib	Contact	Female	19	No		Contact	Yes	NO		Abnormality not detected			TPT Eligible	NO
DHQ 1	Hafizabad	Contact	Male	19	No		Contact	Yes	NO		Abnormality not detected			TPT Eligible	NO
RHC 3	Nankana Sahib	Contact	Male	6	No		Contact	Yes	NO					Refusal
THQ 2	Nankana Sahib	Contact	Female	4	No		Contact							Loss to Follow up
RHC 8	Nankana Sahib	Contact	Male	15	No		Contact	Yes	NO					Refusal
RHC 8	Nankana Sahib	Contact	Male	9	No		Contact	Yes	NO					Refusal
RHC 8	Nankana Sahib	Contact	Male	8	No		Contact	Yes	NO					Refusal
RHC 5	Hafizabad	Contact	Male	13	No		Contact							Refusal
RHC 11	Nankana Sahib	Contact	Male	2	No		Contact							Refusal
RHC 1	Hafizabad	Contact	Male	0	Yes	6	Contact	No						Refusal
DHQ 2	Nankana Sahib	Contact	Female	4	No		Contact	Yes	NO		Abnormality not detected			TPT Eligible	NO
THQ 2	Nankana Sahib	Contact	Female	4	No		Contact	Yes	NO		Abnormality not detected			TPT Eligible	NO
RHC 2	Hafizabad	Contact	Male	25	No		Contact							Refusal
RHC 13	Nankana Sahib	Contact	Male	3	No		Contact	Yes	NO		Abnormality not detected			TPT Eligible	NO
DHQ 2	Nankana Sahib	Contact	Female	2	No		Contact							Loss to Follow up
DHQ 2	Nankana Sahib	Contact	Male	34	No		Contact	Yes	NO					Refusal
DHQ 2	Nankana Sahib	Contact	Female	2	No		Contact	Yes	NO		Abnormality not detected			TPT Eligible	NO
RHC 11	Nankana Sahib	Contact	Male	2	No		Contact	Yes	NO		Abnormality not detected			TPT Eligible	NO
RHC 1	Hafizabad	Contact	Male	28	No		Contact							Refusal
THQ 2	Nankana Sahib	Contact	Male	3	No		Contact	Yes	NO		Abnormality not detected			TPT Eligible	NO
DHQ 2	Nankana Sahib	Contact	Male	60	No		Contact							Refusal
RHC 1	Hafizabad	Contact	Male	25	No		Contact							Refusal
THQ 2	Nankana Sahib	Contact	Female	4	No		Contact	Yes	NO		Abnormality not detected			TPT Eligible	NO
THQ 2	Nankana Sahib	Contact	Male	17	No		Contact	Yes	NO					Refusal
RHC 14	Nankana Sahib	Contact	Male	5	No		Contact	Yes	NO					Refusal
THQ 2	Nankana Sahib	Contact	Male	15	No		Contact	Yes	NO					Refusal
DHQ 2	Nankana Sahib	Contact	Male	55	No		Contact							Refusal
DHQ 2	Nankana Sahib	Contact	Male	3	No		Contact	No						Loss to Follow up
RHC 4	Hafizabad	Index	Male	20
RHC 4	Hafizabad	Index	Male	20	No
RHC 3	Hafizabad	Index	Male	20	No
THQ 1	Hafizabad	Index	Male	20	No
RHC 3	Nankana Sahib	Index	Female	20	No
THQ 2	Nankana Sahib	Contact	Male	20	No		Contact							Loss to Follow up
RHC 14	Nankana Sahib	Contact	Male	20	No		Contact							Loss to Follow up
RHC 8	Nankana Sahib	Contact	Male	20	No		Contact	Yes	NO		Abnormality not detected			TPT Eligible	NO
RHC 4	Hafizabad	Contact	Female	20	No		Contact	Yes	YES	current cough	Abnormality not detected		Smear Negative	TPT Eligible	YES	Married	8	3HP (weekly)	Deferred
RHC 14	Nankana Sahib	Contact	Female	20	No		Contact							Loss to Follow up
RHC 9	Nankana Sahib	Contact	Female	20	No		Contact	Yes	NO		Abnormality not detected			TPT Eligible	NO
RHC 4	Hafizabad	Contact	Male	20	No		Contact							Loss to Follow up
RHC 13	Nankana Sahib	Contact	Female	20	No		Contact	Yes	NO		Abnormality not detected			TPT Eligible	NO
DHQ 2	Nankana Sahib	Contact	Female	20	No		Contact	No						Loss to Follow up
THQ 1	Hafizabad	Contact	Female	20	No		Contact							Loss to Follow up
THQ 1	Hafizabad	Contact	Male	20	No		Contact							Loss to Follow up
RHC 3	Nankana Sahib	Contact	Male	20	No		Contact	Yes	NO		Abnormality not detected			TPT Eligible	NO
DHQ 2	Nankana Sahib	Contact	Male	20	No		Contact							Loss to Follow up
THQ 2	Nankana Sahib	Contact	Male	20	No		Contact							Loss to Follow up
THQ 2	Nankana Sahib	Contact	Female	13	No		Contact							Refusal
RHC 1	Hafizabad	Contact	Female	35	No		Contact							Refusal
RHC 14	Nankana Sahib	Contact	Male	13	No		Contact	Yes	NO					Refusal
THQ 1	Hafizabad	Contact	Male	30	No		Contact							Refusal
RHC 13	Nankana Sahib	Contact	Male	5	No		Contact	Yes	NO					Refusal
THQ 2	Nankana Sahib	Contact	Female	37	No		Contact	Yes	NO					Refusal
RHC 1	Hafizabad	Contact	Female	12	No		Contact							Refusal
DHQ 2	Nankana Sahib	Contact	Male	30	No		Contact	Yes	NO					Refusal
THQ 2	Nankana Sahib	Contact	Female	19	No		Contact	Yes	NO					Refusal
THQ 2	Nankana Sahib	Contact	Male	48	No		Contact							Refusal
RHC 5	Hafizabad	Contact	Male	62	No		Contact							Refusal
THQ 2	Nankana Sahib	Contact	Male	20	No		Contact							Loss to Follow up
RHC 1	Hafizabad	Contact	Female	15	No		Contact							Refusal
RHC 14	Nankana Sahib	Contact	Female	16	No		Contact							Refusal
RHC 1	Hafizabad	Contact	Male	14	No		Contact							Refusal
RHC 2	Hafizabad	Contact	Male	38	No		Contact							Refusal
RHC 3	Hafizabad	Contact	Female	18	No		Contact							Refusal
RHC 5	Hafizabad	Contact	Male	20	No		Contact							Loss to Follow up
RHC 1	Hafizabad	Contact	Female	20	No		Contact							Loss to Follow up
THQ 2	Nankana Sahib	Contact	Male	14	No		Contact	Yes	NO					Refusal
RHC 1	Hafizabad	Contact	Male	19	No		Contact							Refusal
DHQ 2	Nankana Sahib	Contact	Male	24	No		Contact							Refusal
DHQ 2	Nankana Sahib	Contact	Male	48	No		Contact							Refusal
RHC 10	Nankana Sahib	Contact	Male	3	No		Contact	Yes	NO					Refusal
RHC 10	Nankana Sahib	Contact	Female	28	No		Contact							Refusal
RHC 1	Hafizabad	Contact	Male	6	No		Contact							Refusal
DHQ 1	Hafizabad	Contact	Male	19	No		Contact							Refusal
RHC 1	Hafizabad	Contact	Female	11	No		Contact							Refusal
RHC 1	Hafizabad	Contact	Female	35	No		Contact							Refusal
THQ 1	Hafizabad	Contact	Female	40	No		Contact							Refusal
RHC 10	Nankana Sahib	Contact	Female	17	No		Contact							Refusal
RHC 3	Hafizabad	Contact	Female	12	No		Contact							Refusal
RHC 4	Hafizabad	Contact	Female	20	No		Contact	Yes	NO		Abnormality not detected			TPT Eligible	NO
THQ 2	Nankana Sahib	Contact	Male	20	No		Contact							Loss to Follow up
RHC 3	Hafizabad	Contact	Female	20	No		Contact
DHQ 2	Nankana Sahib	Contact	Male	20	No		Contact	Yes	NO		Abnormality not detected			TPT Eligible	NO
RHC 12	Nankana Sahib	Contact	Male	20	No		Contact	Yes	NO		Abnormality not detected			TPT Eligible	NO
DHQ 1	Hafizabad	Contact	Male	20	No		Contact							Loss to Follow up
DHQ 2	Nankana Sahib	Contact	Male	20	No		Contact							Loss to Follow up
DHQ 2	Nankana Sahib	Contact	Female	20	No		Contact							Loss to Follow up
RHC 2	Hafizabad	Contact	Female	20			Contact							Loss to Follow up
DHQ 2	Nankana Sahib	Contact	Female	20	No		Contact	Yes	NO		Abnormality not detected			TPT Eligible	NO
RHC 8	Nankana Sahib	Contact	Male	20	No		Contact	Yes	NO		Abnormality not detected			TPT Eligible	NO
THQ 2	Nankana Sahib	Contact	Female	20	No		Contact							Loss to Follow up
RHC 2	Hafizabad	Contact	Female	20	No		Contact							Loss to Follow up
RHC 5	Hafizabad	Contact	Male	20	No		Contact							Loss to Follow up
RHC 3	Nankana Sahib	Contact	Male	20	No		Contact							Loss to Follow up
DHQ 2	Nankana Sahib	Contact	Male	20	No		Contact							Loss to Follow up
RHC 5	Hafizabad	Contact	Female	20	No		Contact							Loss to Follow up
RHC 5	Hafizabad	Contact	Male	20	No		Contact							Loss to Follow up
DHQ 2	Nankana Sahib	Contact	Male	20	No		Contact							Loss to Follow up
DHQ 2	Nankana Sahib	Contact	Female	20	No		Contact							Loss to Follow up
RHC 5	Hafizabad	Contact	Female	20	No		Contact							Loss to Follow up
RHC 5	Hafizabad	Contact	Female	20	No		Contact							Loss to Follow up
RHC 14	Nankana Sahib	Contact	Male	20	No		Contact	Yes	NO		Abnormality not detected			TPT Eligible	NO
RHC 2	Hafizabad	Contact	Male	7	No		Contact	Yes	NO		Abnormality not detected			TPT Eligible	YES	Single	1	3HP (weekly)	Completed
DHQ 2	Nankana Sahib	Contact	Female	20	No		Contact							Loss to Follow up
DHQ 1	Hafizabad	Contact	Female	20	No		Contact	Yes	NO		Abnormality not detected			TPT Eligible	NO
DHQ 2	Nankana Sahib	Contact	Female	20	No		Contact							Loss to Follow up
RHC 4	Hafizabad	Index	Female	21
RHC 10	Nankana Sahib	Index	Male	21	No
RHC 2	Hafizabad	Index	Female	21	No
RHC 5	Hafizabad	Contact	Female	21	No		Contact							Loss to Follow up
THQ 2	Nankana Sahib	Contact	Female	21	No		Contact	Yes	NO		Abnormality not detected			TPT Eligible	NO
RHC 2	Hafizabad	Contact	Female	4	No		Contact							Refusal
RHC 1	Hafizabad	Contact	Female	3	No		Contact							Refusal
RHC 3	Hafizabad	Contact	Male	28	No		Contact							Refusal
RHC 1	Hafizabad	Contact	Female	3	No		Contact							Refusal
RHC 3	Nankana Sahib	Contact	Female	5	No		Contact	Yes	NO					Refusal
THQ 1	Hafizabad	Contact	Male	30	No		Contact							Refusal
THQ 2	Nankana Sahib	Contact	Female	21	No		Contact	Yes	NO					Refusal
RHC 1	Hafizabad	Contact	Female	30	No		Contact							Refusal
RHC 11	Nankana Sahib	Contact	Female	5	No		Contact							Refusal
RHC 10	Nankana Sahib	Contact	Male	21	No		Contact							Loss to Follow up
DHQ 1	Hafizabad	Contact	Female	21	No		Contact							Loss to Follow up
DHQ 2	Nankana Sahib	Contact	Male	21	No		Contact	Yes	YES	current cough	Abnormality not detected		Smear Negative	TPT Eligible	NO
DHQ 2	Nankana Sahib	Contact	Female	21	No		Contact	Yes	NO		Abnormality not detected			TPT Eligible	NO
RHC 5	Hafizabad	Contact	Female	21	No		Contact							Loss to Follow up
RHC 1	Hafizabad	Contact	Female	21	No		Contact							Loss to Follow up
RHC 11	Nankana Sahib	Contact	Male	21	No		Contact	Yes	NO		Abnormality not detected			TPT Eligible	NO
DHQ 2	Nankana Sahib	Contact	Female	21	No		Contact							Loss to Follow up
THQ 2	Nankana Sahib	Contact	Male	21			Contact							Loss to Follow up
THQ 2	Nankana Sahib	Contact	Female	21	No		Contact							Loss to Follow up
RHC 5	Hafizabad	Contact	Male	21	No		Contact							Loss to Follow up
RHC 11	Nankana Sahib	Contact	Male	21	No		Contact	Yes	NO		Abnormality not detected			TPT Eligible	NO
THQ 1	Hafizabad	Index	Male	22	No
RHC 4	Hafizabad	Index	Male	22	No
RHC 2	Hafizabad	Index	Female	22	No
RHC 2	Hafizabad	Index	Female	22	No
RHC 3	Nankana Sahib	Contact	Male	22	No		Contact	Yes	NO		Abnormality not detected			TPT Eligible	NO
RHC 14	Nankana Sahib	Contact	Female	22	No		Contact							Loss to Follow up
THQ 2	Nankana Sahib	Contact	Female	22	No		Contact							Loss to Follow up
RHC 4	Hafizabad	Contact	Male	22	No		Contact	Yes	NO		Abnormality not detected			TPT Eligible	NO
RHC 10	Nankana Sahib	Contact	Female	22	No		Contact	Yes	NO		Abnormality not detected			TPT Eligible	NO
RHC 5	Hafizabad	Contact	Female	22	No		Contact							Loss to Follow up
RHC 13	Nankana Sahib	Contact	Female	22	No		Contact	Yes	NO		Abnormality not detected			TPT Eligible	NO
THQ 1	Hafizabad	Contact	Female	22	No		Contact	Yes	NO		Abnormality not detected			TPT Eligible	NO
RHC 10	Nankana Sahib	Contact	Female	22	No		Contact	Yes	NO		Abnormality not detected			TPT Eligible	NO
RHC 5	Hafizabad	Contact	Male	22	No		Contact							Loss to Follow up
RHC 1	Hafizabad	Contact	Male	22	No		Contact							Loss to Follow up
DHQ 2	Nankana Sahib	Contact	Female	22	No		Contact							Loss to Follow up
RHC 2	Hafizabad	Contact	Male	18	No		Contact	Yes	NO		Abnormality not detected			TPT Eligible	YES	Single	12	3HP (weekly)	Completed
DHQ 2	Nankana Sahib	Contact	Female	14	No		Contact	Yes	NO					Refusal
RHC 1	Hafizabad	Contact	Male	45	No		Contact							Refusal
RHC 1	Hafizabad	Contact	Male	30	No		Contact							Refusal
RHC 4	Hafizabad	Contact	Male	22	No		Contact	Yes	YES	current cough	Abnormality not detected		Smear Negative	TPT Eligible	NO
THQ 1	Hafizabad	Contact	Female	38	No		Contact							Refusal
RHC 1	Hafizabad	Contact	Female	45	No		Contact							Refusal
THQ 2	Nankana Sahib	Contact	Female	12	No		Contact	Yes	NO					Refusal
DHQ 2	Nankana Sahib	Contact	Female	20	No		Contact							Refusal
RHC 1	Hafizabad	Contact	Female	40	No		Contact							Refusal
DHQ 2	Nankana Sahib	Contact	Female	16	No		Contact							Refusal
RHC 3	Hafizabad	Contact	Female	34	No		Contact							Refusal
RHC 1	Hafizabad	Contact	Female	17	No		Contact							Refusal
THQ 2	Nankana Sahib	Contact	Female	18	No		Contact							Refusal
RHC 1	Hafizabad	Contact	Male	50	No		Contact							Refusal
DHQ 2	Nankana Sahib	Contact	Female	17	No		Contact	Yes	NO					Refusal
RHC 10	Nankana Sahib	Contact	Female	28	No		Contact	Yes	NO					Refusal
RHC 4	Hafizabad	Contact	Male	40	No		Contact							Refusal
RHC 3	Nankana Sahib	Contact	Female	22	No		Contact							Loss to Follow up
RHC 12	Nankana Sahib	Contact	Male	22	No		Contact	Yes	NO		Abnormality not detected			TPT Eligible	NO
RHC 12	Nankana Sahib	Contact	Female	22	No		Contact	Yes	NO		Abnormality not detected			TPT Eligible	NO
RHC 12	Nankana Sahib	Contact	Female	22	No		Contact	Yes	NO		Abnormality not detected			TPT Eligible	NO
RHC 14	Nankana Sahib	Contact	Female	22	No		Contact	Yes	NO		Abnormality not detected			TPT Eligible	NO
RHC 8	Nankana Sahib	Contact	Male	22	No		Contact	Yes	NO		Abnormality not detected			TPT Eligible	NO
THQ 2	Nankana Sahib	Contact	Female	22	No		Contact							Loss to Follow up
THQ 2	Nankana Sahib	Contact	Female	22	No		Contact							Loss to Follow up
RHC 4	Hafizabad	Contact	Male	22	No		Contact	Yes	NO		Abnormality not detected			TPT Eligible	NO
RHC 14	Nankana Sahib	Contact	Male	22	No		Contact	Yes	NO		Abnormality not detected			TPT Eligible	NO
RHC 5	Hafizabad	Contact	Male	22	No		Contact							Loss to Follow up
RHC 9	Nankana Sahib	Contact	Male	22	No		Contact	Yes	NO		Abnormality not detected			TPT Eligible	NO
DHQ 2	Nankana Sahib	Contact	Female	22	No		Contact							Loss to Follow up
THQ 2	Nankana Sahib	Contact	Male	22	No		Contact							Loss to Follow up
RHC 12	Nankana Sahib	Contact	Male	22	No		Contact	Yes	NO		Abnormality not detected			TPT Eligible	NO
DHQ 1	Hafizabad	Contact	Female	22	No		Contact							Loss to Follow up
DHQ 2	Nankana Sahib	Contact	Male	22	No		Contact							Loss to Follow up
RHC 4	Hafizabad	Contact	Female	22	No		Contact	Yes	YES	current cough,fever	Abnormality not detected		Smear Negative	TPT Eligible	NO
THQ 2	Nankana Sahib	Contact	Female	22	No		Contact	Yes	NO		Abnormality not detected			TPT Eligible	NO
DHQ 1	Hafizabad	Index	Male	23
RHC 4	Hafizabad	Index	Female	23	No
DHQ 1	Hafizabad	Index	Female	23	No
THQ 1	Hafizabad	Index	Female	23	No
RHC 5	Hafizabad	Index	Female	23	No
RHC 5	Hafizabad	Index	Female	23	No
THQ 1	Hafizabad	Index	Female	23	No
RHC 2	Hafizabad	Index	Female	23	No
RHC 14	Nankana Sahib	Contact	Male	23	No		Contact							Loss to Follow up
THQ 2	Nankana Sahib	Contact	Male	23	No		Contact							Loss to Follow up
THQ 2	Nankana Sahib	Contact	Female	23	No		Contact							Loss to Follow up
DHQ 2	Nankana Sahib	Contact	Male	23	No		Contact							Loss to Follow up
THQ 2	Nankana Sahib	Contact	Female	23	No		Contact	Yes	NO		Abnormality not detected			TPT Eligible	NO
RHC 3	Hafizabad	Contact	Female	23	No		Contact	Yes	NO		Abnormality not detected			TPT Eligible	NO
RHC 13	Nankana Sahib	Contact	Female	23	No		Contact	Yes	NO		Abnormality not detected			TPT Eligible	NO
RHC 4	Hafizabad	Contact	Male	80	No		Contact	No	NO					Refusal
RHC 2	Hafizabad	Contact	Male	40	No		Contact							Refusal
RHC 9	Nankana Sahib	Contact	Female	20	No		Contact							Refusal
DHQ 2	Nankana Sahib	Contact	Male	10	No		Contact	Yes	NO					Refusal
THQ 2	Nankana Sahib	Contact	Male	13	No		Contact	Yes	NO					Refusal
RHC 5	Hafizabad	Contact	Male	20	No		Contact							Refusal
DHQ 1	Hafizabad	Contact	Male	23	No		Contact							Loss to Follow up
RHC 12	Nankana Sahib	Contact	Male	23	No		Contact	Yes	NO		Abnormality not detected			TPT Eligible	NO
THQ 2	Nankana Sahib	Contact	Female	23	No		Contact							Loss to Follow up
DHQ 2	Nankana Sahib	Contact	Female	23	No		Contact							Loss to Follow up
RHC 14	Nankana Sahib	Contact	Male	23	No		Contact	Yes	NO		Abnormality not detected			TPT Eligible	NO
RHC 3	Hafizabad	Index		24	No
RHC 7	Hafizabad	Contact	Male	24	No		Contact							Loss to Follow up
THQ 2	Nankana Sahib	Contact	Male	24	No		Contact							Loss to Follow up
RHC 11	Nankana Sahib	Contact	Male	24	No		Contact	Yes	NO		Abnormality not detected			TPT Eligible	NO
RHC 5	Hafizabad	Contact	Male	24	No		Contact							Loss to Follow up
RHC 13	Nankana Sahib	Contact	Male	24	No		Contact	Yes	NO		Abnormality not detected			TPT Eligible	NO
RHC 12	Nankana Sahib	Contact	Female	24	No		Contact	Yes	NO		Abnormality not detected			TPT Eligible	NO
RHC 5	Hafizabad	Contact	Male	24	No		Contact							Loss to Follow up
RHC 3	Nankana Sahib	Contact	Female	24	No		Contact	Yes	NO		Abnormality not detected			TPT Eligible	NO
RHC 5	Hafizabad	Contact	Female	24	No		Contact							Loss to Follow up
RHC 4	Hafizabad	Contact	Male	50	No		Contact							Refusal
THQ 2	Nankana Sahib	Contact	Female	12	No		Contact							Refusal
RHC 1	Hafizabad	Contact	Female	13	No		Contact							Refusal
DHQ 1	Hafizabad	Contact	Female	24	No		Contact							Loss to Follow up
RHC 13	Nankana Sahib	Contact	Female	24	No		Contact	Yes	NO		Abnormality not detected			TPT Eligible	NO
RHC 12	Nankana Sahib	Contact	Female	24	No		Contact	Yes	NO		Abnormality not detected			TPT Eligible	NO
DHQ 1	Hafizabad	Contact	Male	24	No		Contact							Loss to Follow up
DHQ 1	Hafizabad	Contact	Male	24	No		Contact							Loss to Follow up
RHC 11	Nankana Sahib	Contact	Male	24	No		Contact	Yes	NO		Abnormality not detected			TPT Eligible	NO
RHC 14	Nankana Sahib	Contact	Male	24	No		Contact	Yes	NO		Abnormality not detected			TPT Eligible	NO
RHC 14	Nankana Sahib	Contact	Male	24	No		Contact	Yes	NO		Abnormality not detected			TPT Eligible	NO
THQ 2	Nankana Sahib	Contact	Female	24	No		Contact							Loss to Follow up
RHC 5	Hafizabad	Contact	Female	24	No		Contact							Loss to Follow up
DHQ 1	Hafizabad	Contact	Female	24	No		Contact							Loss to Follow up
RHC 12	Nankana Sahib	Contact	Male	25	No		Contact	Yes	NO		Abnormality not detected			TPT Eligible	NO
RHC 4	Hafizabad	Index	Male	25
RHC 5	Hafizabad	Index	Male	25	No
DHQ 1	Hafizabad	Contact	Male	25	No		Contact							Loss to Follow up
DHQ 1	Hafizabad	Contact	Female	25	No		Contact							Loss to Follow up
THQ 2	Nankana Sahib	Contact	Female	25	No		Contact							Loss to Follow up
RHC 5	Hafizabad	Contact	Female	25	No		Contact							Loss to Follow up
RHC 5	Hafizabad	Contact	Female	25	No		Contact							Loss to Follow up
DHQ 2	Nankana Sahib	Contact	Female	25	No		Contact							Loss to Follow up
DHQ 2	Nankana Sahib	Contact	Male	25	No		Contact							Loss to Follow up
RHC 14	Nankana Sahib	Contact	Male	25	No		Contact							Loss to Follow up
RHC 14	Nankana Sahib	Contact	Female	25	No		Contact							Loss to Follow up
THQ 2	Nankana Sahib	Contact	Male	25	No		Contact							Loss to Follow up
DHQ 2	Nankana Sahib	Contact	Female	25	No		Contact							Loss to Follow up
RHC 13	Nankana Sahib	Contact	Male	25	No		Contact	Yes	NO		Abnormality not detected			TPT Eligible	NO
DHQ 2	Nankana Sahib	Contact	Female	25	No		Contact							Loss to Follow up
RHC 5	Hafizabad	Contact	Male	25	No		Contact							Loss to Follow up
THQ 1	Hafizabad	Contact	Male	25	No		Contact							Loss to Follow up
RHC 5	Hafizabad	Contact	Male	25	No		Contact							Loss to Follow up
RHC 4	Hafizabad	Contact	Male	25	No		Contact	Yes	NO		Abnormality not detected			TPT Eligible	NO
RHC 14	Nankana Sahib	Contact	Female	25	No		Contact	Yes	NO		Abnormality not detected			TPT Eligible	NO
RHC 1	Hafizabad	Contact	Female	15	No		Contact							Refusal
DHQ 2	Nankana Sahib	Contact	Female	25	No		Contact	No						Loss to Follow up
DHQ 2	Nankana Sahib	Contact	Female	12	No		Contact	Yes	NO					Refusal
RHC 1	Hafizabad	Contact	Female	30	No		Contact							Refusal
RHC 1	Hafizabad	Contact	Female	6	No		Contact							Refusal
RHC 3	Hafizabad	Contact	Male	46	No		Contact							Refusal
RHC 1	Hafizabad	Contact	Female	52	No		Contact							Refusal
RHC 10	Nankana Sahib	Contact	Male	27	No		Contact	Yes	NO					Refusal
RHC 11	Nankana Sahib	Contact	Female	10	No		Contact							Refusal
DHQ 2	Nankana Sahib	Contact	Female	20	No		Contact	Yes	NO					Refusal
THQ 2	Nankana Sahib	Contact	Male	64	No		Contact	Yes	NO					Refusal
RHC 3	Hafizabad	Contact	Male	32	No		Contact							Refusal
THQ 1	Hafizabad	Contact	Female	16	No		Contact							Refusal
THQ 2	Nankana Sahib	Contact	Female	10	No		Contact	Yes	NO					Refusal
DHQ 2	Nankana Sahib	Contact	Female	12	No		Contact	Yes	NO					Refusal
THQ 2	Nankana Sahib	Contact	Female	18	No		Contact	Yes	NO					Refusal
DHQ 2	Nankana Sahib	Contact	Female	40	No		Contact							Refusal
DHQ 1	Hafizabad	Contact	Male	25	No		Contact							Loss to Follow up
RHC 1	Hafizabad	Contact	Male	75	No		Contact							Refusal
THQ 1	Hafizabad	Contact	Male	40	No		Contact							Refusal
RHC 1	Hafizabad	Contact	Male	53	No		Contact	No	NO					Refusal
DHQ 2	Nankana Sahib	Contact	Male	30	No		Contact	Yes	NO					Refusal
RHC 1	Hafizabad	Contact	Male	40	No		Contact							Refusal
RHC 5	Hafizabad	Contact	Female	4	No		Contact							Refusal
DHQ 2	Nankana Sahib	Contact	Female	25	No		Contact	Yes	NO		Abnormality not detected			TPT Eligible	NO
RHC 3	Hafizabad	Contact	Female	25	No		Contact
THQ 2	Nankana Sahib	Contact	Female	25	No		Contact	Yes	NO		Abnormality not detected			TPT Eligible	NO
DHQ 2	Nankana Sahib	Contact	Male	25	No		Contact	Yes	NO		Abnormality not detected			TPT Eligible	NO
THQ 2	Nankana Sahib	Contact	Female	25	No		Contact							Loss to Follow up
DHQ 2	Nankana Sahib	Contact	Female	25	No		Contact	Yes	NO		Abnormality not detected			TPT Eligible	NO
RHC 12	Nankana Sahib	Contact	Male	25	No		Contact	Yes	NO		Abnormality not detected			TPT Eligible	NO
DHQ 1	Hafizabad	Contact	Male	25	No		Contact							Loss to Follow up
DHQ 2	Nankana Sahib	Contact	Female	25	No		Contact	No						Loss to Follow up
THQ 2	Nankana Sahib	Contact	Female	25	No		Contact	Yes	NO		Abnormality not detected			TPT Eligible	NO
THQ 2	Nankana Sahib	Contact	Male	25	No		Contact	Yes	NO		Abnormality not detected			TPT Eligible	NO
RHC 5	Hafizabad	Contact	Male	25	No		Contact							Loss to Follow up
RHC 5	Hafizabad	Contact	Male	25	No		Contact							Loss to Follow up
DHQ 2	Nankana Sahib	Contact	Female	25	No		Contact							Loss to Follow up
RHC 4	Hafizabad	Contact	Female	25	No		Contact	Yes	NO		Abnormality not detected			TPT Eligible	NO
RHC 12	Nankana Sahib	Contact	Male	25	No		Contact	Yes	NO		Abnormality not detected			TPT Eligible	NO
RHC 12	Nankana Sahib	Contact	Male	25	No		Contact	Yes	NO		Abnormality not detected			TPT Eligible	NO
DHQ 2	Nankana Sahib	Contact	Male	25	No		Contact	Yes	NO		Abnormality not detected			TPT Eligible	NO
RHC 14	Nankana Sahib	Contact	Female	25	No		Contact	Yes	NO		Abnormality not detected			TPT Eligible	NO
RHC 5	Hafizabad	Contact	Male	25	No		Contact							Loss to Follow up
DHQ 2	Nankana Sahib	Contact	Male	25	No		Contact							Loss to Follow up
RHC 4	Hafizabad	Index	Male	26	No
DHQ 1	Hafizabad	Index	Male	26	No
THQ 1	Hafizabad	Index	Male	26	No
THQ 1	Hafizabad	Index	Male	26	No
RHC 2	Hafizabad	Index		26	No
THQ 2	Nankana Sahib	Index	Female	26	No
RHC 5	Hafizabad	Index	Female	26	No
THQ 1	Hafizabad	Index	Male	26	No
RHC 4	Hafizabad	Contact	Male	26	No		Contact	Yes	NO		Abnormality not detected			TPT Eligible	NO
RHC 3	Nankana Sahib	Contact	Female	26	No		Contact	Yes	NO		Abnormality not detected			TPT Eligible	NO
THQ 1	Hafizabad	Contact	Male	26	No		Contact							Loss to Follow up
RHC 3	Nankana Sahib	Contact	Male	26	No		Contact	Yes	NO		Abnormality not detected			TPT Eligible	NO
DHQ 2	Nankana Sahib	Contact	Male	26	No		Contact							Loss to Follow up
RHC 14	Nankana Sahib	Contact	Female	26	No		Contact	Yes	NO		Abnormality not detected			TPT Eligible	NO
RHC 1	Hafizabad	Contact	Male	1			Contact							Refusal
THQ 2	Nankana Sahib	Contact	Male	48	No		Contact							Refusal
RHC 1	Hafizabad	Contact	Female	3	No		Contact							Refusal
RHC 11	Nankana Sahib	Contact	Female	14	No		Contact	Yes	NO					Refusal
THQ 1	Hafizabad	Contact	Female	20	No		Contact							Refusal
THQ 2	Nankana Sahib	Contact	Female	25	No		Contact	Yes	NO					Refusal
RHC 1	Hafizabad	Contact	Female	7	No		Contact							Refusal
DHQ 1	Hafizabad	Contact	Male	26	No		Contact							Loss to Follow up
DHQ 1	Hafizabad	Contact	Male	26	No		Contact							Loss to Follow up
DHQ 2	Nankana Sahib	Contact	Female	26	No		Contact	Yes	NO		Abnormality not detected			TPT Eligible	NO
RHC 14	Nankana Sahib	Contact	Female	26	No		Contact	Yes	NO		Abnormality not detected			TPT Eligible	NO
RHC 14	Nankana Sahib	Contact	Female	26	No		Contact	Yes	NO		Abnormality not detected			TPT Eligible	NO
RHC 12	Nankana Sahib	Contact	Female	26	No		Contact	Yes	NO		Abnormality not detected			TPT Eligible	NO
RHC 8	Nankana Sahib	Contact	Male	26	No		Contact	Yes	NO		Abnormality not detected			TPT Eligible	NO
RHC 8	Nankana Sahib	Contact	Female	26	No		Contact	Yes	NO		Abnormality not detected			TPT Eligible	NO
DHQ 1	Hafizabad	Contact	Male	26	No		Contact							Loss to Follow up
THQ 2	Nankana Sahib	Contact	Male	26	No		Contact							Loss to Follow up
RHC 10	Nankana Sahib	Contact	Male	26	No		Contact							Loss to Follow up
RHC 10	Nankana Sahib	Contact	Male	26	No		Contact	Yes	NO		Abnormality not detected			TPT Eligible	NO
RHC 14	Nankana Sahib	Contact	Male	26	No		Contact							Loss to Follow up
RHC 5	Hafizabad	Contact	Female	26	No		Contact							Loss to Follow up
RHC 10	Nankana Sahib	Contact	Female	26	No		Contact							Loss to Follow up
THQ 2	Nankana Sahib	Contact	Female	26	No		Contact							Loss to Follow up
DHQ 1	Hafizabad	Contact	Female	26	No		Contact	No						Loss to Follow up
DHQ 1	Hafizabad	Contact	Female	26	No		Contact	Yes	NO		Abnormality not detected			TPT Eligible	NO
THQ 1	Hafizabad	Index	Female	27	No
RHC 11	Nankana Sahib	Index	Female	27	No
RHC 4	Hafizabad	Index	Male	27	No
RHC 3	Hafizabad	Contact	Female	27	No		Contact
RHC 1	Hafizabad	Contact	Female	27	No		Contact							Loss to Follow up
RHC 1	Hafizabad	Contact	Female	12	No		Contact							Refusal
RHC 1	Hafizabad	Contact	Female	15	No		Contact							Refusal
DHQ 2	Nankana Sahib	Contact	Male	12	No		Contact							Refusal
RHC 4	Hafizabad	Contact	Male	20	No		Contact	No	NO					Refusal
DHQ 2	Nankana Sahib	Contact	Male	3	No		Contact	Yes	NO					Refusal
RHC 10	Nankana Sahib	Contact	Female	5	No		Contact	Yes	NO					Refusal
THQ 2	Nankana Sahib	Contact	Male	8	No		Contact	Yes	NO					Refusal
RHC 13	Nankana Sahib	Contact	Male	27	No		Contact	Yes	NO		Abnormality not detected			TPT Eligible	NO
THQ 1	Hafizabad	Contact	Male	27	No		Contact	Yes	NO		Abnormality not detected			TPT Eligible	NO
DHQ 2	Nankana Sahib	Contact	Female	27	No		Contact							Loss to Follow up
RHC 2	Hafizabad	Contact	Female	27	No		Contact							Loss to Follow up
THQ 2	Nankana Sahib	Contact	Male	27	No		Contact							Loss to Follow up
RHC 10	Nankana Sahib	Contact	Male	27	No		Contact							Loss to Follow up
RHC 8	Nankana Sahib	Contact	Female	27	No		Contact	Yes	NO		Abnormality not detected			TPT Eligible	NO
RHC 3	Nankana Sahib	Contact	Male	27	No		Contact	Yes	YES	current cough	Abnormality Detected		Smear Negative	TB Patient
DHQ 1	Hafizabad	Contact	Female	27	No		Contact	No						Loss to Follow up
DHQ 1	Hafizabad	Contact	Female	27	No		Contact							Loss to Follow up
THQ 1	Hafizabad	Index	Male	28	No
THQ 2	Nankana Sahib	Index	Female	28	No
RHC 3	Nankana Sahib	Index	Female	28	No
THQ 2	Nankana Sahib	Index	Female	28	No
THQ 2	Nankana Sahib	Index	Female	28	No
RHC 1	Hafizabad	Index	Female	28	No
DHQ 1	Hafizabad	Index	Female	28
DHQ 2	Nankana Sahib	Index	Male	28	No
RHC 5	Hafizabad	Index	Female	28	No
DHQ 1	Hafizabad	Index	Female	28	No
THQ 1	Hafizabad	Index	Female	28	No
RHC 3	Nankana Sahib	Index	Male	28	No
THQ 2	Nankana Sahib	Index	Female	29	No
THQ 2	Nankana Sahib	Contact	Male	28	No		Contact							Loss to Follow up
DHQ 2	Nankana Sahib	Contact	Male	28	No		Contact							Loss to Follow up
RHC 8	Nankana Sahib	Contact	Male	28	No		Contact	Yes	NO		Abnormality not detected			TPT Eligible	NO
DHQ 2	Nankana Sahib	Contact	Female	28	No		Contact							Loss to Follow up
RHC 3	Nankana Sahib	Contact	Male	28	No		Contact	Yes	NO		Abnormality not detected			TPT Eligible	NO
RHC 5	Hafizabad	Contact	Male	28	No		Contact							Loss to Follow up
THQ 2	Nankana Sahib	Contact	Male	28	No		Contact							Loss to Follow up
RHC 3	Nankana Sahib	Contact	Female	28	No		Contact	Yes	NO		Abnormality not detected			TPT Eligible	NO
THQ 1	Hafizabad	Contact	Male	12	No		Contact							Refusal
THQ 1	Hafizabad	Contact	Male	35	No		Contact							Refusal
RHC 14	Nankana Sahib	Contact	Male	18	No		Contact	Yes	NO					Refusal
THQ 2	Nankana Sahib	Contact	Male	28	No		Contact	Yes	NO					Refusal
THQ 2	Nankana Sahib	Contact	Female	5	No		Contact	Yes	NO					Refusal
RHC 1	Hafizabad	Contact	Male	12	No		Contact							Refusal
DHQ 2	Nankana Sahib	Contact	Male	13	No		Contact							Refusal
THQ 1	Hafizabad	Contact	Male	23	No		Contact							Refusal
THQ 1	Hafizabad	Contact	Male	25	No		Contact							Refusal
DHQ 2	Nankana Sahib	Contact	Male	3	No		Contact							Refusal
RHC 5	Hafizabad	Contact	Male	2	No		Contact							Refusal
DHQ 2	Nankana Sahib	Contact	Male	3	No		Contact	Yes	NO					Refusal
DHQ 2	Nankana Sahib	Contact	Male	3	No		Contact	Yes	NO					Refusal
RHC 5	Hafizabad	Contact	Male	2	No		Contact							Refusal
RHC 1	Hafizabad	Contact	Male	0	Yes	3	Contact							Refusal
RHC 3	Hafizabad	Contact	Male	30	No		Contact							Refusal
THQ 2	Nankana Sahib	Contact	Male	28	No		Contact	Yes	NO		Abnormality not detected			TPT Eligible	NO
THQ 1	Hafizabad	Contact	Male	33	No		Contact							Refusal
THQ 1	Hafizabad	Contact	Male	35	No		Contact							Refusal
RHC 3	Hafizabad	Contact	Male	45	No		Contact							Refusal
RHC 3	Hafizabad	Contact	Female	28	No		Contact
DHQ 2	Nankana Sahib	Contact	Female	28	No		Contact							Loss to Follow up
RHC 12	Nankana Sahib	Contact	Male	28	No		Contact	Yes	NO		Abnormality not detected			TPT Eligible	NO
DHQ 1	Hafizabad	Contact	Female	28	No		Contact	Yes	NO		Abnormality not detected			TPT Eligible	NO
RHC 8	Nankana Sahib	Contact	Male	28	No		Contact	Yes	NO		Abnormality not detected			TPT Eligible	NO
DHQ 1	Hafizabad	Contact	Female	28	No		Contact							Loss to Follow up
DHQ 1	Hafizabad	Contact	Male	28	No		Contact							Loss to Follow up
THQ 2	Nankana Sahib	Contact	Female	28	No		Contact							Loss to Follow up
DHQ 2	Nankana Sahib	Contact	Female	28	No		Contact							Loss to Follow up
RHC 11	Nankana Sahib	Contact	Female	28	No		Contact	Yes	NO		Abnormality not detected			TPT Eligible	NO
DHQ 2	Nankana Sahib	Contact	Female	28	No		Contact							Loss to Follow up
THQ 2	Nankana Sahib	Contact	Female	28	No		Contact	No						Loss to Follow up
RHC 10	Nankana Sahib	Contact	Male	28	No		Contact							Loss to Follow up
RHC 14	Nankana Sahib	Contact	Female	28	No		Contact	Yes	NO		Abnormality not detected			TPT Eligible	NO
RHC 11	Nankana Sahib	Contact	Male	28	No		Contact	Yes	NO		Abnormality not detected			TPT Eligible	NO
RHC 8	Nankana Sahib	Contact	Male	28	No		Contact	Yes	NO		Abnormality not detected			TPT Eligible	NO
DHQ 1	Hafizabad	Contact	Female	28	No		Contact							Loss to Follow up
THQ 1	Hafizabad	Index	Male	29	No
RHC 4	Hafizabad	Index	Male	29	No
THQ 2	Nankana Sahib	Index	Male	29	No
THQ 2	Nankana Sahib	Index	Male	29	No
RHC 7	Hafizabad	Contact	Female	29	No		Contact							Loss to Follow up
DHQ 1	Hafizabad	Contact	Female	29	No		Contact	No	NO					Loss to Follow up
RHC 1	Hafizabad	Contact	Male	50	No		Contact							Refusal
RHC 1	Hafizabad	Contact	Male	50	No		Contact							Refusal
THQ 1	Hafizabad	Contact	Male	55	No		Contact							Refusal
DHQ 2	Nankana Sahib	Contact	Male	6	No		Contact	Yes	NO					Refusal
RHC 14	Nankana Sahib	Contact	Male	29	No		Contact	Yes	NO		Abnormality not detected			TPT Eligible	NO
DHQ 2	Nankana Sahib	Contact	Female	29	No		Contact	Yes	NO		Abnormality not detected			TPT Eligible	NO
DHQ 2	Nankana Sahib	Contact	Female	29	No		Contact							Loss to Follow up
THQ 2	Nankana Sahib	Contact	Female	0	Yes	6 Month	Contact							Loss to Follow up
RHC 5	Hafizabad	Contact	Male	6	No		Contact							Refusal
RHC 5	Hafizabad	Contact	Female	3	No		Contact							Loss to Follow up
THQ 1	Hafizabad	Contact	Male	63	No		Contact							Refusal
RHC 1	Hafizabad	Contact	Male	65	No		Contact							Refusal
RHC 1	Hafizabad	Contact	Male	2	No		Contact							Loss to Follow up
RHC 1	Hafizabad	Contact	Male	70	No		Contact							Refusal
DHQ 2	Nankana Sahib	Contact	Male	3	No		Contact	Yes	NO		Abnormality not detected			TPT Eligible	NO
RHC 1	Hafizabad	Contact	Male	8	No		Contact							Refusal
RHC 11	Nankana Sahib	Contact	Male	8	No		Contact	Yes	NO					Refusal
RHC 12	Nankana Sahib	Contact	Male	12	No		Contact							Refusal
RHC 3	Nankana Sahib	Contact	Male	22	No		Contact	Yes	NO					Refusal
RHC 8	Nankana Sahib	Contact	Male	8	No		Contact	Yes	NO					Refusal
DHQ 1	Hafizabad	Contact	Male	2	No		Contact							Loss to Follow up
RHC 5	Hafizabad	Contact	Male	4	No		Contact							Loss to Follow up
RHC 5	Hafizabad	Contact	Male	0	Yes	8	Contact							Refusal
RHC 14	Nankana Sahib	Contact	Male	70	No		Contact	Yes	NO					Refusal
RHC 14	Nankana Sahib	Contact	Male	3	No		Contact	Yes	NO		Abnormality not detected			TPT Eligible	NO
DHQ 2	Nankana Sahib	Contact	Male	26	No		Contact							Refusal
RHC 11	Nankana Sahib	Contact	Male	4	No		Contact	Yes	NO		Abnormality not detected			TPT Eligible	NO
THQ 1	Hafizabad	Contact	Male	45	No		Contact							Refusal
DHQ 2	Nankana Sahib	Contact	Female	4	No		Contact							Loss to Follow up
DHQ 2	Nankana Sahib	Contact	Female	3	No		Contact	Yes	NO		Abnormality not detected			TPT Eligible	NO
DHQ 1	Hafizabad	Contact	Male	50	No		Contact							Refusal
THQ 2	Nankana Sahib	Contact	Male	60	No		Contact							Refusal
RHC 3	Nankana Sahib	Contact	Male	5	No		Contact	Yes	NO					Refusal
RHC 3	Hafizabad	Index	Male	30	No
DHQ 1	Hafizabad	Index	Female	30	No
RHC 2	Hafizabad	Index	Female	30	No
DHQ 2	Nankana Sahib	Index	Male	30	No
RHC 1	Hafizabad	Index	Male	30	No
DHQ 2	Nankana Sahib	Index	Female	30	No
THQ 1	Hafizabad	Index	Male	30	No
RHC 5	Hafizabad	Index	Male	30	No
DHQ 1	Hafizabad	Index	Female	30	No
THQ 2	Nankana Sahib	Index	Female	30	No
RHC 1	Hafizabad	Index	Female	30	No
THQ 2	Nankana Sahib	Contact	Male	30	No		Contact							Loss to Follow up
DHQ 2	Nankana Sahib	Contact	Male	30	No		Contact							Loss to Follow up
THQ 2	Nankana Sahib	Contact	Female	30	No		Contact	Yes	NO		Abnormality not detected			TPT Eligible	NO
THQ 2	Nankana Sahib	Contact	Male	30	No		Contact							Loss to Follow up
DHQ 1	Hafizabad	Contact	Male	30	No		Contact							Loss to Follow up
RHC 5	Hafizabad	Contact	Female	30	No		Contact							Loss to Follow up
DHQ 1	Hafizabad	Contact	Male	30	No		Contact							Loss to Follow up
DHQ 1	Hafizabad	Contact	Female	30	No		Contact							Loss to Follow up
RHC 8	Nankana Sahib	Contact	Female	30	No		Contact	Yes	NO		Abnormality not detected			TPT Eligible	NO
DHQ 2	Nankana Sahib	Contact	Male	30	No		Contact							Loss to Follow up
RHC 3	Nankana Sahib	Contact	Male	30	No		Contact	Yes	NO		Abnormality not detected			TPT Eligible	NO
THQ 1	Hafizabad	Contact	Male	30	No		Contact							Loss to Follow up
DHQ 2	Nankana Sahib	Contact	Female	30	No		Contact							Loss to Follow up
RHC 14	Nankana Sahib	Contact	Male	30	No		Contact	Yes	NO		Abnormality not detected			TPT Eligible	NO
RHC 9	Nankana Sahib	Contact	Male	30	No		Contact							Loss to Follow up
RHC 3	Nankana Sahib	Contact	Male	30	No		Contact							Loss to Follow up
DHQ 2	Nankana Sahib	Contact	Female	30	No		Contact	Yes	NO		Abnormality not detected			TPT Eligible	NO
DHQ 2	Nankana Sahib	Contact	Male	30	No		Contact	Yes	NO		Abnormality not detected			TPT Eligible	NO
DHQ 1	Hafizabad	Contact	Male	30	No		Contact							Loss to Follow up
RHC 3	Nankana Sahib	Contact	Male	30	No		Contact	Yes	NO		Abnormality not detected			TPT Eligible	NO
RHC 5	Hafizabad	Contact	Female	30	No		Contact	Yes	NO		Abnormality not detected			TPT Eligible	NO
RHC 3	Hafizabad	Contact	Male	30	No		Contact
THQ 2	Nankana Sahib	Contact	Male	40	No		Contact	Yes	NO					Refusal
DHQ 2	Nankana Sahib	Contact	Male	65	No		Contact	Yes	NO					Refusal
DHQ 2	Nankana Sahib	Contact	Male	18	No		Contact	Yes	NO					Refusal
DHQ 2	Nankana Sahib	Contact	Male	55	No		Contact							Refusal
RHC 14	Nankana Sahib	Contact	Male	16	No		Contact	Yes	NO					Refusal
RHC 5	Hafizabad	Contact	Male	10	No		Contact							Refusal
RHC 14	Nankana Sahib	Contact	Male	5	No		Contact	Yes	NO					Refusal
DHQ 2	Nankana Sahib	Contact	Male	52	No		Contact	Yes	NO					Refusal
DHQ 2	Nankana Sahib	Contact	Male	2	No		Contact	Yes	NO					Refusal
RHC 14	Nankana Sahib	Contact	Male	65	No		Contact	Yes	NO					Refusal
RHC 3	Nankana Sahib	Contact	Male	6	No		Contact	Yes	NO					Refusal
RHC 12	Nankana Sahib	Contact	Male	8	No		Contact	Yes	NO					Refusal
THQ 2	Nankana Sahib	Contact	Male	23	No		Contact							Refusal
RHC 8	Nankana Sahib	Contact	Female	30	No		Contact	Yes	NO		Abnormality not detected			TPT Eligible	NO
RHC 5	Hafizabad	Contact	Male	7	No		Contact							Refusal
DHQ 1	Hafizabad	Contact	Male	65	No		Contact							Refusal
RHC 9	Nankana Sahib	Contact	Male	38	No		Contact							Refusal
RHC 14	Nankana Sahib	Contact	Female	27	No		Contact	Yes	NO					Refusal
THQ 2	Nankana Sahib	Contact	Male	22	No		Contact	Yes	NO					Refusal
RHC 1	Hafizabad	Contact	Male	40	No		Contact							Refusal
RHC 2	Hafizabad	Contact	Male	30	No		Contact							Loss to Follow up
RHC 14	Nankana Sahib	Contact	Male	10	No		Contact							Refusal
RHC 14	Nankana Sahib	Contact	Male	15	No		Contact	Yes	NO					Refusal
DHQ 2	Nankana Sahib	Contact	Male	28	No		Contact							Refusal
RHC 9	Nankana Sahib	Contact	Male	7	No		Contact	Yes	NO					Refusal
RHC 1	Hafizabad	Contact	Female	24	No		Contact							Refusal
THQ 2	Nankana Sahib	Contact	Female	15	No		Contact	Yes	NO					Refusal
RHC 4	Hafizabad	Contact	Female	20	No		Contact	No	NO					Refusal
THQ 2	Nankana Sahib	Contact	Female	9	No		Contact	Yes	NO					Refusal
RHC 1	Hafizabad	Contact	Female	11	No		Contact	No	NO					Refusal
RHC 14	Nankana Sahib	Contact	Male	21	No		Contact							Refusal
RHC 1	Hafizabad	Contact	Female	30	No		Contact							Refusal
RHC 1	Hafizabad	Contact	Female	30	No		Contact	No	NO					Refusal
THQ 2	Nankana Sahib	Contact	Male	30	No		Contact							Loss to Follow up
DHQ 2	Nankana Sahib	Contact	Male	30	No		Contact	Yes	NO		Abnormality not detected			TPT Eligible	NO
THQ 1	Hafizabad	Contact	Female	52	No		Contact							Refusal
RHC 14	Nankana Sahib	Contact	Male	13	No		Contact							Refusal
RHC 10	Nankana Sahib	Contact	Male	30	No		Contact							Loss to Follow up
RHC 1	Hafizabad	Contact	Female	7	No		Contact							Refusal
THQ 1	Hafizabad	Contact	Male	25	No		Contact							Refusal
RHC 1	Hafizabad	Contact	Female	28	No		Contact							Refusal
RHC 1	Hafizabad	Contact	Female	8	No		Contact							Refusal
THQ 2	Nankana Sahib	Contact	Male	14	No		Contact	Yes	NO					Refusal
RHC 2	Hafizabad	Contact	Male	12	No		Contact	Yes	NO		Abnormality not detected			TPT Eligible	YES	Single	5	3HP (weekly)	Completed
RHC 10	Nankana Sahib	Contact	Male	30	No		Contact	Yes	NO		Abnormality not detected			TPT Eligible	NO
RHC 11	Nankana Sahib	Contact	Male	30	No		Contact	Yes	NO		Abnormality not detected			TPT Eligible	NO
THQ 2	Nankana Sahib	Contact	Male	30	No		Contact	Yes	YES	current cough	Abnormality not detected		Smear Negative	TPT Eligible	NO
RHC 2	Hafizabad	Contact	Male	30	No		Contact							Loss to Follow up
RHC 2	Hafizabad	Contact	Male	30	No		Contact							Loss to Follow up
RHC 5	Hafizabad	Contact	Male	30	No		Contact							Loss to Follow up
RHC 5	Hafizabad	Contact	Female	30	No		Contact							Loss to Follow up
RHC 5	Hafizabad	Contact	Female	30	No		Contact							Loss to Follow up
DHQ 2	Nankana Sahib	Contact	Female	30	No		Contact							Loss to Follow up
RHC 2	Hafizabad	Contact	Female	30	No		Contact							Loss to Follow up
DHQ 2	Nankana Sahib	Contact	Male	30	No		Contact							Loss to Follow up
DHQ 2	Nankana Sahib	Contact	Female	30	No		Contact							Loss to Follow up
DHQ 2	Nankana Sahib	Contact	Male	30	No		Contact							Loss to Follow up
RHC 9	Nankana Sahib	Contact	Female	30	No		Contact	Yes	NO		Abnormality not detected			TPT Eligible	NO
DHQ 2	Nankana Sahib	Contact	Male	30	No		Contact							Loss to Follow up
THQ 2	Nankana Sahib	Contact	Female	30	No		Contact							Loss to Follow up
RHC 5	Hafizabad	Contact	Female	30	No		Contact							Loss to Follow up
DHQ 1	Hafizabad	Contact	Male	30	No		Contact	Yes	NO		Abnormality not detected			TPT Eligible	NO
RHC 14	Nankana Sahib	Contact	Male	30	No		Contact	Yes	NO		Abnormality not detected			TPT Eligible	NO
THQ 2	Nankana Sahib	Index	Male	31	No
RHC 3	Nankana Sahib	Index	Female	31	No
RHC 3	Nankana Sahib	Index	Female	31	No
RHC 13	Nankana Sahib	Index	Male	31	No
THQ 1	Hafizabad	Index	Male	31	No
DHQ 2	Nankana Sahib	Index	Male	31	No
THQ 2	Nankana Sahib	Index	Male	31	No
RHC 3	Nankana Sahib	Index	Male	32	No
THQ 2	Nankana Sahib	Index	Male	32	No
RHC 11	Nankana Sahib	Index	Male	32	No
RHC 13	Nankana Sahib	Index	Male	32	No
DHQ 1	Hafizabad	Index	Female	32
DHQ 2	Nankana Sahib	Index	Male	32	No
RHC 1	Hafizabad	Index	Male	32	No
DHQ 2	Nankana Sahib	Index	Male	32	No
THQ 2	Nankana Sahib	Index	Male	32	No
THQ 2	Nankana Sahib	Index	Female	32	No
RHC 1	Hafizabad	Index	Male	32	No
DHQ 1	Hafizabad	Index	Female	32	No
RHC 14	Nankana Sahib	Index	Male	32	No
DHQ 2	Nankana Sahib	Index	Male	32	No
THQ 2	Nankana Sahib	Index	Female	32	No
THQ 2	Nankana Sahib	Index	Female	32	No
RHC 3	Nankana Sahib	Index	Female	32	No
THQ 2	Nankana Sahib	Index	Female	32	No
DHQ 2	Nankana Sahib	Index	Female	32	No
RHC 3	Nankana Sahib	Index	Female	32	No
DHQ 2	Nankana Sahib	Index	Female	32	No
RHC 5	Hafizabad	Index	Female	32	No
RHC 10	Nankana Sahib	Contact	Male	32	No		Contact	Yes	NO		Abnormality not detected			TPT Eligible	NO
RHC 8	Nankana Sahib	Contact	Male	32	No		Contact	Yes	NO		Abnormality not detected			TPT Eligible	NO
DHQ 1	Hafizabad	Contact	Male	32	No		Contact							Loss to Follow up
DHQ 1	Hafizabad	Contact	Male	32	No		Contact							Loss to Follow up
RHC 3	Hafizabad	Contact	Female	32	No		Contact	Yes	NO		Abnormality not detected			TPT Eligible	NO
RHC 1	Hafizabad	Contact	Male	32	No		Contact							Loss to Follow up
THQ 2	Nankana Sahib	Contact	Female	32	No		Contact							Loss to Follow up
RHC 3	Nankana Sahib	Contact	Male	32	No		Contact							Loss to Follow up
DHQ 2	Nankana Sahib	Contact	Female	32	No		Contact							Loss to Follow up
DHQ 1	Hafizabad	Contact	Female	32	No		Contact							Loss to Follow up
DHQ 1	Hafizabad	Contact	Male	32	No		Contact	Yes	NO		Abnormality not detected			TPT Eligible	NO
THQ 2	Nankana Sahib	Contact	Male	32	No		Contact							Loss to Follow up
RHC 8	Nankana Sahib	Contact	Male	32	No		Contact	Yes	NO		Abnormality not detected			TPT Eligible	NO
DHQ 2	Nankana Sahib	Contact	Male	11	No		Contact	Yes	NO					Refusal
DHQ 2	Nankana Sahib	Contact	Female	20	No		Contact	Yes	NO					Refusal
RHC 1	Hafizabad	Contact	Female	25	No		Contact							Refusal
RHC 1	Hafizabad	Contact	Female	19	No		Contact							Refusal
RHC 3	Hafizabad	Contact	Male	28	No		Contact							Refusal
DHQ 1	Hafizabad	Contact	Male	40	No		Contact							Refusal
DHQ 2	Nankana Sahib	Contact	Female	27	No		Contact							Refusal
THQ 1	Hafizabad	Contact	Male	5	No		Contact							Refusal
RHC 4	Hafizabad	Contact	Female	32	No		Contact							Refusal
THQ 2	Nankana Sahib	Contact	Female	39	No		Contact	Yes	NO					Refusal
RHC 1	Hafizabad	Contact	Female	46	No		Contact							Refusal
THQ 2	Nankana Sahib	Contact	Female	32	No		Contact	Yes	NO		Abnormality not detected			TPT Eligible	NO
RHC 3	Nankana Sahib	Contact	Female	32	No		Contact	Yes	NO		Abnormality not detected			TPT Eligible	NO
RHC 5	Hafizabad	Contact	Male	32	No		Contact							Loss to Follow up
RHC 13	Nankana Sahib	Contact	Female	32	No		Contact	Yes	NO		Abnormality not detected			TPT Eligible	NO
RHC 11	Nankana Sahib	Contact	Male	32	No		Contact	Yes	NO		Abnormality not detected			TPT Eligible	NO
RHC 12	Nankana Sahib	Contact	Male	32	No		Contact	Yes	NO		Abnormality not detected			TPT Eligible	NO
RHC 10	Nankana Sahib	Contact	Male	32	No		Contact	Yes	NO		Abnormality not detected			TPT Eligible	NO
THQ 2	Nankana Sahib	Contact	Male	32	No		Contact							Loss to Follow up
RHC 2	Hafizabad	Index	Female	33	No
RHC 3	Nankana Sahib	Index	Male	33	No
DHQ 2	Nankana Sahib	Index	Female	33	No
DHQ 1	Hafizabad	Index		33	No
RHC 2	Hafizabad	Contact	Male	18	No		Contact	Yes	NO		Abnormality not detected			TPT Eligible	YES	Single	10	3HP (weekly)	Completed
DHQ 2	Nankana Sahib	Index	Female	33	No
DHQ 1	Hafizabad	Contact	Male	33	No		Contact							Loss to Follow up
RHC 13	Nankana Sahib	Contact	Female	33	No		Contact	Yes	NO		Abnormality not detected			TPT Eligible	NO
RHC 5	Hafizabad	Contact	Female	33	No		Contact							Loss to Follow up
DHQ 1	Hafizabad	Contact	Female	33	No		Contact							Loss to Follow up
RHC 5	Hafizabad	Contact	Male	40	No		Contact							Refusal
RHC 3	Hafizabad	Contact	Female	40	No		Contact							Refusal
RHC 9	Nankana Sahib	Contact	Female	30	No		Contact							Refusal
THQ 2	Nankana Sahib	Contact	Male	55	No		Contact							Refusal
DHQ 2	Nankana Sahib	Contact	Female	33	No		Contact							Loss to Follow up
DHQ 1	Hafizabad	Index	Female	33
THQ 2	Nankana Sahib	Index	Male	34	No
RHC 4	Hafizabad	Index	Male	34	No
DHQ 2	Nankana Sahib	Index	Male	34	No
THQ 2	Nankana Sahib	Index	Male	34	No
DHQ 2	Nankana Sahib	Index	Male	34	No
RHC 3	Nankana Sahib	Index	Female	34	No
RHC 3	Nankana Sahib	Index	Male	34	No
DHQ 2	Nankana Sahib	Index	Female	34	No
DHQ 2	Nankana Sahib	Index	Female	34	No
RHC 2	Hafizabad	Index	Female	34	No
THQ 2	Nankana Sahib	Index	Female	34	No
THQ 2	Nankana Sahib	Index	Male	34	No
RHC 11	Nankana Sahib	Index	Female	34	No
RHC 11	Nankana Sahib	Index	Female	34	No
DHQ 2	Nankana Sahib	Index	Female	34	No
RHC 12	Nankana Sahib	Index	Male	34	No
RHC 3	Nankana Sahib	Index	Female	34	No
RHC 14	Nankana Sahib	Index	Female	34	No
THQ 1	Hafizabad	Index	Male	34	No
DHQ 2	Nankana Sahib	Index	Female	34	No
THQ 2	Nankana Sahib	Index	Male	34	No
RHC 3	Nankana Sahib	Index	Female	34	No
THQ 2	Nankana Sahib	Index	Male	34	No
RHC 1	Hafizabad	Index	Male	34	No
RHC 2	Hafizabad	Index	Female	34	No
RHC 13	Nankana Sahib	Contact	Male	34	No		Contact	Yes	NO		Abnormality not detected			TPT Eligible	NO
THQ 2	Nankana Sahib	Contact	Male	60	No		Contact	Yes	NO					Refusal
RHC 10	Nankana Sahib	Contact	Female	28	No		Contact							Refusal
DHQ 2	Nankana Sahib	Contact	Female	36	No		Contact							Refusal
RHC 14	Nankana Sahib	Contact	Female	27	No		Contact	Yes	NO					Refusal
RHC 2	Hafizabad	Contact	Female	48	No		Contact							Refusal
RHC 1	Hafizabad	Contact	Male	22	No		Contact							Refusal
THQ 2	Nankana Sahib	Contact	Male	3	No		Contact							Refusal
RHC 5	Hafizabad	Index	Male	35	No
RHC 11	Nankana Sahib	Index	Female	35	No
RHC 9	Nankana Sahib	Index	Male	35	No
THQ 2	Nankana Sahib	Index	Female	35	No
RHC 7	Hafizabad	Index	Female	35	No
RHC 3	Hafizabad	Index	Female	35	No
THQ 2	Nankana Sahib	Index	Male	35	No
RHC 5	Hafizabad	Index	Female	35	No
RHC 8	Nankana Sahib	Index	Female	35	No
DHQ 1	Hafizabad	Index	Female	35	No
DHQ 2	Nankana Sahib	Index	Female	35	No
DHQ 1	Hafizabad	Index	Female	35	No
RHC 11	Nankana Sahib	Index	Male	35	No
THQ 2	Nankana Sahib	Index	Female	35	No
RHC 9	Nankana Sahib	Index	Female	35	No
DHQ 1	Hafizabad	Index	Female	35	No
DHQ 2	Nankana Sahib	Index	Female	35	No
DHQ 2	Nankana Sahib	Index	Female	35	No
RHC 14	Nankana Sahib	Index	Male	35	No
RHC 3	Nankana Sahib	Index	Male	35	No
DHQ 1	Hafizabad	Index	Female	35	No
THQ 2	Nankana Sahib	Index	Male	35	No
THQ 1	Hafizabad	Index	Male	35	No
THQ 2	Nankana Sahib	Index	Male	35	No
RHC 5	Hafizabad	Contact	Female	35	No		Contact							Loss to Follow up
RHC 14	Nankana Sahib	Contact	Female	35	No		Contact	Yes	NO		Abnormality not detected			TPT Eligible	NO
RHC 14	Nankana Sahib	Contact	Male	35	No		Contact	Yes	NO		Abnormality not detected			TPT Eligible	NO
THQ 2	Nankana Sahib	Contact	Male	35	No		Contact							Loss to Follow up
RHC 7	Hafizabad	Contact	Female	35	No		Contact							Loss to Follow up
RHC 5	Hafizabad	Contact	Female	35	No		Contact							Loss to Follow up
RHC 3	Hafizabad	Contact	Male	35	No		Contact
THQ 1	Hafizabad	Contact	Female	35	No		Contact							Loss to Follow up
DHQ 2	Nankana Sahib	Contact	Male	35	No		Contact							Loss to Follow up
THQ 2	Nankana Sahib	Contact	Male	35	No		Contact	Yes	YES	current cough	Abnormality Detected		Smear Negative	TPT Eligible	NO
RHC 8	Nankana Sahib	Contact	Male	35	No		Contact	Yes	NO		Abnormality not detected			TPT Eligible	NO
RHC 2	Hafizabad	Contact	Female	35	No		Contact							Loss to Follow up
RHC 3	Nankana Sahib	Contact	Female	35	No		Contact	Yes	NO		Abnormality not detected			TPT Eligible	NO
DHQ 2	Nankana Sahib	Contact	Male	35	No		Contact	Yes	NO		Abnormality not detected			TPT Eligible	NO
DHQ 1	Hafizabad	Contact	Female	35	No		Contact							Loss to Follow up
DHQ 1	Hafizabad	Contact	Male	35	No		Contact							Loss to Follow up
RHC 1	Hafizabad	Contact	Female	35	No		Contact							Loss to Follow up
DHQ 1	Hafizabad	Contact	Male	35	No		Contact							Loss to Follow up
DHQ 2	Nankana Sahib	Contact	Male	35	No		Contact							Loss to Follow up
DHQ 2	Nankana Sahib	Contact	Male	35	No		Contact	Yes	NO		Abnormality not detected			TPT Eligible	NO
RHC 1	Hafizabad	Contact	Female	26	No		Contact							Refusal
RHC 14	Nankana Sahib	Contact	Female	35	No		Contact							Loss to Follow up
DHQ 2	Nankana Sahib	Contact	Female	50	No		Contact	Yes	NO					Refusal
RHC 1	Hafizabad	Contact	Female	35	No		Contact							Refusal
DHQ 2	Nankana Sahib	Contact	Female	35	No		Contact							Loss to Follow up
RHC 14	Nankana Sahib	Contact	Female	7	No		Contact	Yes	NO					Refusal
RHC 1	Hafizabad	Contact	Female	22	No		Contact	No						Refusal
RHC 4	Hafizabad	Contact	Female	30	No		Contact							Refusal
RHC 1	Hafizabad	Contact	Female	36	No		Contact							Refusal
RHC 1	Hafizabad	Contact	Female	50	No		Contact							Refusal
RHC 14	Nankana Sahib	Contact	Female	35	No		Contact							Refusal
RHC 1	Hafizabad	Contact	Male	40	No		Contact							Refusal
RHC 3	Nankana Sahib	Contact	Female	80	No		Contact							Refusal
DHQ 2	Nankana Sahib	Contact	Female	20	No		Contact							Refusal
THQ 2	Nankana Sahib	Contact	Male	16	No		Contact	Yes	NO					Refusal
RHC 1	Hafizabad	Contact	Male	75	No		Contact							Refusal
RHC 13	Nankana Sahib	Contact	Female	5	No		Contact	Yes	NO					Refusal
THQ 2	Nankana Sahib	Contact	Female	6	No		Contact	Yes	NO					Refusal
THQ 2	Nankana Sahib	Contact	Female	6	No		Contact	Yes	NO					Refusal
RHC 3	Hafizabad	Contact	Female	7	No		Contact							Refusal
THQ 2	Nankana Sahib	Contact	Female	7	No		Contact							Refusal
RHC 5	Hafizabad	Contact	Female	35	No		Contact							Loss to Follow up
RHC 5	Hafizabad	Contact	Male	35	No		Contact							Loss to Follow up
RHC 5	Hafizabad	Contact	Female	35	No		Contact							Loss to Follow up
DHQ 2	Nankana Sahib	Contact	Male	35	No		Contact							Loss to Follow up
RHC 5	Hafizabad	Contact	Female	35	No		Contact							Loss to Follow up
RHC 12	Nankana Sahib	Contact	Male	35	No		Contact	Yes	NO		Abnormality not detected			TPT Eligible	NO
RHC 1	Hafizabad	Contact	Male	35	No		Contact							Loss to Follow up
THQ 2	Nankana Sahib	Contact	Male	35	No		Contact	Yes	NO		Abnormality not detected			TPT Eligible	NO
THQ 2	Nankana Sahib	Contact	Male	35	No		Contact							Loss to Follow up
RHC 10	Nankana Sahib	Contact	Female	35	No		Contact	Yes	NO		Abnormality not detected			TPT Eligible	NO
THQ 2	Nankana Sahib	Contact	Male	35	No		Contact							Loss to Follow up
RHC 2	Hafizabad	Contact	Female	35	No		Contact							Loss to Follow up
RHC 3	Nankana Sahib	Contact	Female	35	No		Contact	Yes	NO		Abnormality not detected			TPT Eligible	NO
DHQ 2	Nankana Sahib	Contact	Male	35	No		Contact							Loss to Follow up
DHQ 2	Nankana Sahib	Contact	Female	35	No		Contact							Loss to Follow up
THQ 2	Nankana Sahib	Contact	Female	35	No		Contact							Loss to Follow up
THQ 2	Nankana Sahib	Contact	Male	35	No		Contact							Loss to Follow up
RHC 1	Hafizabad	Contact	Male	35	No		Contact - Current TB
RHC 3	Nankana Sahib	Contact	Male	35	No		Contact	Yes	NO		Abnormality not detected			TPT Eligible	NO
RHC 3	Nankana Sahib	Contact	Female	35	No		Contact	Yes	NO		Abnormality not detected			TPT Eligible	NO
RHC 4	Hafizabad	Contact	Female	35	No		Contact	Yes	YES	current cough	Abnormality not detected		Smear Negative	TPT Eligible	NO
RHC 4	Hafizabad	Index	Male	36	No
THQ 2	Nankana Sahib	Index	Male	36	No
RHC 5	Hafizabad	Index	Male	36	No
DHQ 2	Nankana Sahib	Index	Female	36	No
RHC 13	Nankana Sahib	Index	Female	36	No
THQ 1	Hafizabad	Index	Male	36	No
RHC 14	Nankana Sahib	Index	Female	36	No
DHQ 2	Nankana Sahib	Index	Female	36	No
DHQ 2	Nankana Sahib	Index	Female	36	No
THQ 2	Nankana Sahib	Index	Male	36	No
THQ 1	Hafizabad	Index	Male	36	No
DHQ 2	Nankana Sahib	Index	Male	36	No
THQ 2	Nankana Sahib	Index	Female	36	No
DHQ 1	Hafizabad	Index	Female	36	No
DHQ 2	Nankana Sahib	Index	Female	36	No
THQ 1	Hafizabad	Index	Male	36	No
THQ 1	Hafizabad	Index	Female	36	No
THQ 1	Hafizabad	Index	Female	36	No
DHQ 1	Hafizabad	Index	Female	36	No
RHC 4	Hafizabad	Index	Female	36	No
DHQ 1	Hafizabad	Index	Female	36	No
DHQ 2	Nankana Sahib	Index	Female	36	No
RHC 13	Nankana Sahib	Index	Female	36	No
DHQ 1	Hafizabad	Index	Female	36	No
DHQ 1	Hafizabad	Index	Female	36	No
RHC 3	Nankana Sahib	Index	Male	36	No
THQ 2	Nankana Sahib	Index	Female	36	No
DHQ 1	Hafizabad	Contact	Female	36	No		Contact							Loss to Follow up
RHC 3	Nankana Sahib	Contact	Female	36	No		Contact	Yes	NO		Abnormality not detected			TPT Eligible	NO
DHQ 1	Hafizabad	Contact	Male	36	No		Contact							Loss to Follow up
RHC 10	Nankana Sahib	Contact	Male	36	No		Contact							Loss to Follow up
RHC 10	Nankana Sahib	Contact	Female	32	No		Contact							Refusal
DHQ 1	Hafizabad	Contact	Male	22	No		Contact							Refusal
THQ 1	Hafizabad	Contact	Female	45	No		Contact							Refusal
RHC 1	Hafizabad	Contact	Female	60	No		Contact							Refusal
RHC 5	Hafizabad	Contact	Female	36	No		Contact							Loss to Follow up
RHC 12	Nankana Sahib	Contact	Male	36	No		Contact	Yes	NO		Abnormality not detected			TPT Eligible	NO
RHC 2	Hafizabad	Index	Male	37	No
RHC 10	Nankana Sahib	Index	Male	37	No
RHC 3	Nankana Sahib	Index	Female	37	No
RHC 13	Nankana Sahib	Index	Male	37	No
THQ 2	Nankana Sahib	Index	Female	37	No
DHQ 2	Nankana Sahib	Index	Female	37	No
DHQ 2	Nankana Sahib	Index	Male	37	No
THQ 2	Nankana Sahib	Index	Male	37	No
THQ 2	Nankana Sahib	Index	Female	37	No
RHC 14	Nankana Sahib	Index	Female	37	No
DHQ 2	Nankana Sahib	Index	Female	37	No
DHQ 2	Nankana Sahib	Index	Female	37	No
RHC 9	Nankana Sahib	Index	Female	37	No
RHC 3	Nankana Sahib	Index	Female	37	No
RHC 2	Hafizabad	Contact	Male	20	No		Contact	Yes	YES	current cough	Abnormality not detected		Smear Negative	TPT Eligible	NO
RHC 14	Nankana Sahib	Index	Male	37	No
RHC 3	Nankana Sahib	Index	Male	37	No
RHC 8	Nankana Sahib	Index	Male	37	No
RHC 14	Nankana Sahib	Index	Male	37	No
DHQ 1	Hafizabad	Index	Male	37
RHC 14	Nankana Sahib	Index	Male	37	No
DHQ 2	Nankana Sahib	Index	Male	37	No
THQ 2	Nankana Sahib	Index	Female	37	No
RHC 3	Hafizabad	Index	Male	37
DHQ 2	Nankana Sahib	Index	Female	37	No
DHQ 2	Nankana Sahib	Index	Female	37	No
DHQ 2	Nankana Sahib	Index	Male	37	No
DHQ 2	Nankana Sahib	Index	Female	37	No
RHC 3	Nankana Sahib	Index	Female	37	No
THQ 2	Nankana Sahib	Index	Male	37	No
RHC 12	Nankana Sahib	Index	Female	37	No
DHQ 2	Nankana Sahib	Index	Male	37	No
DHQ 2	Nankana Sahib	Index	Male	37	No
RHC 8	Nankana Sahib	Index	Male	37	No
THQ 2	Nankana Sahib	Index	Female	37	No
DHQ 2	Nankana Sahib	Contact	Female	37	No		Contact	Yes	YES	current cough	Abnormality not detected		Smear Negative	TPT Eligible	NO
RHC 3	Nankana Sahib	Contact	Male	37	No		Contact	Yes	NO		Abnormality not detected			TPT Eligible	NO
RHC 14	Nankana Sahib	Contact	Male	57	No		Contact	Yes	NO					Refusal
DHQ 2	Nankana Sahib	Index	Female	37	No
THQ 2	Nankana Sahib	Index	Male	38	No
DHQ 2	Nankana Sahib	Index	Male	38	No
RHC 9	Nankana Sahib	Index	Male	38	No
DHQ 2	Nankana Sahib	Index	Male	38	No
THQ 2	Nankana Sahib	Index	Female	38	No
THQ 2	Nankana Sahib	Index	Female	38	No
RHC 3	Nankana Sahib	Index	Female	38	No
RHC 5	Hafizabad	Index	Female	38	No
RHC 3	Nankana Sahib	Index	Female	38	No
RHC 3	Nankana Sahib	Index	Female	38	No
DHQ 2	Nankana Sahib	Index	Female	38	No
DHQ 2	Nankana Sahib	Index	Male	38	No
RHC 1	Hafizabad	Index	Male	38	No
RHC 10	Nankana Sahib	Index	Male	38	No
RHC 9	Nankana Sahib	Index	Female	38	No
RHC 14	Nankana Sahib	Index	Male	38	No
RHC 8	Nankana Sahib	Index	Male	38	No
THQ 2	Nankana Sahib	Index	Male	38	No
DHQ 2	Nankana Sahib	Index	Male	38	No
DHQ 2	Nankana Sahib	Index	Male	38	No
RHC 10	Nankana Sahib	Index	Male	38	No
RHC 3	Nankana Sahib	Index	Male	38	No
DHQ 2	Nankana Sahib	Index	Male	38	No
RHC 10	Nankana Sahib	Index	Female	38	No
RHC 10	Nankana Sahib	Index	Female	38	No
THQ 1	Hafizabad	Index	Male	38	No
RHC 14	Nankana Sahib	Index	Female	38	No
RHC 14	Nankana Sahib	Index	Female	38	No
DHQ 2	Nankana Sahib	Index	Male	38	No
RHC 13	Nankana Sahib	Index	Female	38	No
THQ 2	Nankana Sahib	Index	Female	38	No
THQ 2	Nankana Sahib	Index	Female	38	No
RHC 8	Nankana Sahib	Index	Male	38	No
RHC 11	Nankana Sahib	Index	Female	38	No
RHC 14	Nankana Sahib	Index	Male	38	No
DHQ 2	Nankana Sahib	Index	Male	38	No
RHC 10	Nankana Sahib	Index	Male	38	No
RHC 3	Nankana Sahib	Index	Male	38	No
DHQ 2	Nankana Sahib	Index	Female	38	No
DHQ 2	Nankana Sahib	Index	Female	38	No
RHC 11	Nankana Sahib	Index	Male	38	No
DHQ 2	Nankana Sahib	Index	Female	38	No
RHC 3	Nankana Sahib	Index	Female	38	No
RHC 14	Nankana Sahib	Index	Male	38	No
RHC 12	Nankana Sahib	Index	Male	38	No
RHC 10	Nankana Sahib	Index	Female	38	No
DHQ 2	Nankana Sahib	Index	Female	38	No
DHQ 2	Nankana Sahib	Index	Female	38	No
RHC 14	Nankana Sahib	Contact	Male	38	No		Contact	Yes	NO		Abnormality not detected			TPT Eligible	NO
THQ 2	Nankana Sahib	Contact	Female	38	No		Contact	Yes	YES	current cough	Abnormality not detected		Smear Negative	TPT Eligible	NO
RHC 5	Hafizabad	Contact	Male	38	No		Contact							Loss to Follow up
RHC 14	Nankana Sahib	Contact	Male	38	No		Contact	Yes	NO		Abnormality not detected			TPT Eligible	NO
DHQ 2	Nankana Sahib	Contact	Male	38	No		Contact	Yes	NO		Abnormality not detected			TPT Eligible	NO
THQ 2	Nankana Sahib	Contact	Male	38	No		Contact	Yes	YES	current cough	Abnormality Detected		Smear Negative	TPT Eligible	NO
RHC 2	Hafizabad	Contact	Female	38	No		Contact							Loss to Follow up
DHQ 2	Nankana Sahib	Contact	Female	50	No		Contact							Refusal
RHC 14	Nankana Sahib	Contact	Female	17	No		Contact	Yes	NO					Refusal
RHC 3	Nankana Sahib	Contact	Female	56	No		Contact	Yes	NO					Refusal
THQ 2	Nankana Sahib	Contact	Male	45	No		Contact	Yes	NO					Refusal
RHC 1	Hafizabad	Contact	Male	17	No		Contact							Refusal
RHC 3	Nankana Sahib	Contact	Male	38	No		Contact	Yes	NO		Abnormality not detected			TPT Eligible	NO
THQ 2	Nankana Sahib	Index	Male	38	No
DHQ 2	Nankana Sahib	Index	Male	39	No
DHQ 1	Hafizabad	Index	Male	39	No
RHC 14	Nankana Sahib	Index	Male	39	No
RHC 9	Nankana Sahib	Index	Male	39	No
DHQ 2	Nankana Sahib	Index	Male	39	No
RHC 13	Nankana Sahib	Index	Female	39	No
THQ 1	Hafizabad	Index		39	No
RHC 13	Nankana Sahib	Index	Female	39	No
RHC 3	Nankana Sahib	Index	Female	39	No
DHQ 2	Nankana Sahib	Index	Male	39	No
RHC 9	Nankana Sahib	Index	Female	39	No
THQ 2	Nankana Sahib	Index	Female	39	No
RHC 14	Nankana Sahib	Index	Male	39	No
DHQ 2	Nankana Sahib	Index	Male	39	No
THQ 2	Nankana Sahib	Index	Female	39	No
RHC 3	Nankana Sahib	Index	Male	39	No
RHC 14	Nankana Sahib	Index	Male	39	No
RHC 13	Nankana Sahib	Index	Male	39	No
RHC 12	Nankana Sahib	Index	Male	39	No
THQ 2	Nankana Sahib	Index	Male	39	No
THQ 2	Nankana Sahib	Index	Male	39	No
RHC 2	Hafizabad	Index	Female	39
DHQ 2	Nankana Sahib	Index	Male	39	No
RHC 14	Nankana Sahib	Index	Female	39	No
THQ 2	Nankana Sahib	Index	Male	39	No
RHC 8	Nankana Sahib	Index	Male	39	No
RHC 1	Hafizabad	Index	Female	39
DHQ 2	Nankana Sahib	Index	Female	39	No
DHQ 2	Nankana Sahib	Index	Male	39	No
DHQ 2	Nankana Sahib	Index	Female	39	No
RHC 10	Nankana Sahib	Index	Female	39	No
RHC 14	Nankana Sahib	Index	Female	39	No
DHQ 2	Nankana Sahib	Index	Male	39	No
DHQ 2	Nankana Sahib	Index	Female	39	No
RHC 12	Nankana Sahib	Index	Female	39	No
DHQ 2	Nankana Sahib	Index	Female	39	No
THQ 2	Nankana Sahib	Index	Female	39	No
RHC 11	Nankana Sahib	Index	Female	39	No
RHC 5	Hafizabad	Index	Female	39	No
RHC 4	Hafizabad	Index	Female	39	No
DHQ 2	Nankana Sahib	Index	Male	39	No
RHC 8	Nankana Sahib	Index	Male	39	No
RHC 14	Nankana Sahib	Contact	Female	39	No		Contact	Yes	NO		Abnormality not detected			TPT Eligible	NO
RHC 1	Hafizabad	Contact	Male	52	No		Contact							Refusal
RHC 3	Hafizabad	Contact	Male	35	No		Contact							Refusal
RHC 13	Nankana Sahib	Contact	Male	39	No		Contact	Yes	NO		Abnormality not detected			TPT Eligible	NO
RHC 11	Nankana Sahib	Contact	Female	39	No		Contact							Loss to Follow up
THQ 2	Nankana Sahib	Contact	Male	3	No		Contact							Loss to Follow up
RHC 1	Hafizabad	Contact	Male	20	No		Contact	No	NO					Refusal
THQ 2	Nankana Sahib	Contact	Male	18	No		Contact	Yes	NO					Refusal
RHC 1	Hafizabad	Contact	Female	18	No		Contact							Refusal
THQ 1	Hafizabad	Contact	Female	3	No		Contact	Yes	NO		Abnormality not detected			TPT Eligible	NO
THQ 2	Nankana Sahib	Contact	Female	22	No		Contact							Refusal
THQ 2	Nankana Sahib	Contact	Female	60	No		Contact							Refusal
DHQ 2	Nankana Sahib	Contact	Female	0	Yes	6	Contact							Loss to Follow up
RHC 1	Hafizabad	Contact	Male	16	No		Contact	No	NO					Refusal
RHC 1	Hafizabad	Contact	Male	16	No		Contact							Refusal
RHC 4	Hafizabad	Contact	Male	45	No		Contact							Refusal
DHQ 2	Nankana Sahib	Contact	Male	0	Yes	5 M	Contact							Loss to Follow up
RHC 14	Nankana Sahib	Contact	Female	18	No		Contact	Yes	NO					Refusal
RHC 5	Hafizabad	Contact	Female	6	No		Contact							Refusal
RHC 3	Hafizabad	Contact	Male	3	No		Contact	Yes	NO		Abnormality not detected			TPT Eligible	NO
RHC 11	Nankana Sahib	Contact	Male	3	No		Contact							Refusal
RHC 1	Hafizabad	Contact	Female	34	No		Contact							Refusal
DHQ 2	Nankana Sahib	Contact	Female	3	No		Contact	Yes	NO					Refusal
DHQ 2	Nankana Sahib	Contact	Male	60	No		Contact							Refusal
DHQ 2	Nankana Sahib	Contact	Female	4	No		Contact							Loss to Follow up
RHC 2	Hafizabad	Contact	Male	32	No		Contact							Refusal
RHC 5	Hafizabad	Contact	Female	4	No		Contact							Loss to Follow up
RHC 14	Nankana Sahib	Contact	Male	13	No		Contact							Refusal
DHQ 2	Nankana Sahib	Contact	Female	3	No		Contact							Loss to Follow up
RHC 14	Nankana Sahib	Contact	Female	50	No		Contact							Refusal
DHQ 2	Nankana Sahib	Contact	Male	0	Yes	1	Contact							Refusal
THQ 1	Hafizabad	Contact	Male	42	No		Contact							Refusal
DHQ 2	Nankana Sahib	Index	Male	39	No
RHC 3	Hafizabad	Index	Female	40	No
DHQ 2	Nankana Sahib	Index	Female	40	No
THQ 1	Hafizabad	Index	Male	40	No
DHQ 2	Nankana Sahib	Index	Male	40	No
RHC 4	Hafizabad	Index	Male	40	No		Contact
RHC 1	Hafizabad	Index	Female	40	No
THQ 1	Hafizabad	Index	Male	40	No
RHC 1	Hafizabad	Index	Female	40	No
RHC 5	Hafizabad	Index	Female	40	No
RHC 1	Hafizabad	Index	Female	40	No
RHC 10	Nankana Sahib	Index	Female	40	No
RHC 3	Hafizabad	Index	Male	40	No
DHQ 2	Nankana Sahib	Index	Female	40	No
RHC 1	Hafizabad	Index	Female	40	No
RHC 13	Nankana Sahib	Index	Male	40	No
DHQ 2	Nankana Sahib	Index	Male	40	No
RHC 1	Hafizabad	Index	Female	40	No
DHQ 1	Hafizabad	Index	Female	40	No
RHC 12	Nankana Sahib	Index	Male	40	No
DHQ 1	Hafizabad	Index	Male	40	No
DHQ 2	Nankana Sahib	Index	Male	40	No
RHC 10	Nankana Sahib	Index	Female	40	No
RHC 3	Nankana Sahib	Index	Female	40	No
DHQ 2	Nankana Sahib	Index	Male	40	No
RHC 2	Hafizabad	Index	Female	40
DHQ 2	Nankana Sahib	Index	Female	40	No
DHQ 2	Nankana Sahib	Index	Female	40	No
DHQ 2	Nankana Sahib	Contact	Male	40	No		Contact							Loss to Follow up
RHC 9	Nankana Sahib	Contact	Female	40	No		Contact	Yes	NO		Abnormality not detected			TPT Eligible	NO
RHC 11	Nankana Sahib	Contact	Male	40	No		Contact	Yes	NO		Abnormality not detected			TPT Eligible	NO
DHQ 2	Nankana Sahib	Contact	Female	40	No		Contact							Loss to Follow up
RHC 5	Hafizabad	Contact	Female	40	No		Contact							Loss to Follow up
THQ 2	Nankana Sahib	Contact	Male	40	No		Contact							Loss to Follow up
RHC 3	Nankana Sahib	Contact	Female	40	No		Contact	Yes	NO		Abnormality not detected			TPT Eligible	NO
THQ 1	Hafizabad	Contact	Male	40	No		Contact							Loss to Follow up
DHQ 2	Nankana Sahib	Contact	Male	40	No		Contact							Loss to Follow up
RHC 3	Nankana Sahib	Contact	Male	40	No		Contact	Yes	NO		Abnormality not detected			TPT Eligible	NO
THQ 2	Nankana Sahib	Contact	Female	40	No		Contact							Loss to Follow up
RHC 9	Nankana Sahib	Contact	Male	40	No		Contact							Loss to Follow up
RHC 1	Hafizabad	Contact	Male	40	No		Contact							Loss to Follow up
DHQ 1	Hafizabad	Contact	Male	40	No		Contact	No	NO					Loss to Follow up
DHQ 2	Nankana Sahib	Contact	Male	40	No		Contact							Loss to Follow up
DHQ 2	Nankana Sahib	Contact	Male	40	No		Contact							Loss to Follow up
DHQ 2	Nankana Sahib	Contact	Female	40	No		Contact	Yes	NO		Abnormality not detected			TPT Eligible	NO
DHQ 2	Nankana Sahib	Contact	Female	40	No		Contact	Yes	NO		Abnormality not detected			TPT Eligible	NO
RHC 1	Hafizabad	Contact	Female	40	No		Contact							Loss to Follow up
RHC 2	Hafizabad	Contact	Female	40	No		Contact	Yes	NO		Abnormality not detected			TPT Eligible	NO
DHQ 1	Hafizabad	Contact	Male	40	No		Contact							Loss to Follow up
DHQ 2	Nankana Sahib	Contact	Male	40	No		Contact							Loss to Follow up
THQ 2	Nankana Sahib	Contact	Female	40	No		Contact							Loss to Follow up
DHQ 2	Nankana Sahib	Contact	Male	40	No		Contact	Yes	NO		Abnormality not detected			TPT Eligible	NO
DHQ 2	Nankana Sahib	Contact	Female	40	No		Contact							Loss to Follow up
RHC 2	Hafizabad	Contact	Male	18	No		Contact	Yes	YES	current cough	Abnormality not detected		Smear Negative	TPT Eligible	YES	Single	3	3HP (weekly)	Completed
DHQ 2	Nankana Sahib	Contact	Male	40	No		Contact							Loss to Follow up
RHC 2	Hafizabad	Contact	Female	40	No		Contact							Loss to Follow up
RHC 1	Hafizabad	Contact	Male	26	No		Contact	No	NO					Refusal
RHC 10	Nankana Sahib	Contact	Female	40	No		Contact							Refusal
RHC 14	Nankana Sahib	Contact	Female	15	No		Contact							Refusal
DHQ 2	Nankana Sahib	Contact	Female	10	No		Contact							Refusal
THQ 2	Nankana Sahib	Contact	Male	9	No		Contact	Yes	NO					Refusal
RHC 14	Nankana Sahib	Contact	Male	5	No		Contact	Yes	NO					Refusal
THQ 2	Nankana Sahib	Contact	Female	43	No		Contact	Yes	NO					Refusal
RHC 2	Hafizabad	Contact	Female	30	No		Contact							Refusal
RHC 9	Nankana Sahib	Contact	Male	10	No		Contact	Yes	NO					Refusal
THQ 2	Nankana Sahib	Contact	Male	28	No		Contact	Yes	NO					Refusal
RHC 11	Nankana Sahib	Contact	Female	15	No		Contact							Refusal
DHQ 2	Nankana Sahib	Contact	Female	21	No		Contact	Yes	NO					Refusal
DHQ 2	Nankana Sahib	Contact	Female	22	No		Contact							Refusal
RHC 8	Nankana Sahib	Contact	Male	18	No		Contact	Yes	NO					Refusal
RHC 1	Hafizabad	Contact	Male	18	No		Contact							Refusal
THQ 2	Nankana Sahib	Contact	Female	40	No		Contact							Loss to Follow up
THQ 1	Hafizabad	Contact	Male	25	No		Contact							Refusal
RHC 1	Hafizabad	Contact	Male	26	No		Contact							Refusal
RHC 5	Hafizabad	Contact	Female	5	No		Contact							Refusal
DHQ 2	Nankana Sahib	Contact	Male	25	No		Contact	Yes	NO					Refusal
THQ 2	Nankana Sahib	Contact	Male	42	No		Contact	Yes	NO					Refusal
DHQ 2	Nankana Sahib	Contact	Female	30	No		Contact							Refusal
DHQ 2	Nankana Sahib	Contact	Female	25	No		Contact	Yes	NO					Refusal
RHC 5	Hafizabad	Contact	Female	29	No		Contact							Refusal
RHC 2	Hafizabad	Contact	Male	14	No		Contact	Yes	YES	fever	Abnormality not detected		Smear Negative	TPT Eligible	YES	Single	5	3HP (weekly)	Completed
THQ 2	Nankana Sahib	Contact	Female	15	No		Contact	Yes	NO					Refusal
DHQ 2	Nankana Sahib	Contact	Female	15	No		Contact							Refusal
RHC 3	Hafizabad	Contact	Female	30	No		Contact							Refusal
RHC 1	Hafizabad	Contact	Female	60	No		Contact	No	NO					Refusal
RHC 1	Hafizabad	Contact	Female	15	No		Contact							Refusal
THQ 2	Nankana Sahib	Contact	Female	18	No		Contact	Yes	NO					Refusal
THQ 2	Nankana Sahib	Contact	Female	19	No		Contact	Yes	NO					Refusal
RHC 1	Hafizabad	Contact	Female	28	No		Contact							Refusal
DHQ 2	Nankana Sahib	Contact	Male	40	No		Contact							Loss to Follow up
RHC 14	Nankana Sahib	Contact	Male	40	No		Contact	Yes	NO		Abnormality not detected			TPT Eligible	NO
RHC 11	Nankana Sahib	Contact	Female	40	No		Contact	Yes	NO		Abnormality not detected			TPT Eligible	NO
DHQ 2	Nankana Sahib	Contact	Female	40	No		Contact							Loss to Follow up
RHC 9	Nankana Sahib	Contact	Male	40	No		Contact	Yes	NO		Abnormality not detected			TPT Eligible	NO
RHC 9	Nankana Sahib	Contact	Male	40	No		Contact	Yes	NO		Abnormality not detected			TPT Eligible	NO
RHC 3	Nankana Sahib	Contact	Male	40	No		Contact	Yes	NO		Abnormality not detected			TPT Eligible	NO
RHC 13	Nankana Sahib	Contact	Male	40	No		Contact	Yes	NO		Abnormality not detected			TPT Eligible	NO
DHQ 1	Hafizabad	Contact	Female	40	No		Contact							Loss to Follow up
DHQ 2	Nankana Sahib	Contact	Male	40	No		Contact							Loss to Follow up
DHQ 2	Nankana Sahib	Contact	Male	40	No		Contact							Loss to Follow up
RHC 14	Nankana Sahib	Contact	Male	40	No		Contact	Yes	NO		Abnormality not detected			TPT Eligible	NO
THQ 2	Nankana Sahib	Index	Male	40	No
THQ 2	Nankana Sahib	Index	Male	41	No
RHC 3	Nankana Sahib	Index	Female	41	No
RHC 14	Nankana Sahib	Index	Male	41	No
RHC 9	Nankana Sahib	Index	Male	41	No
RHC 8	Nankana Sahib	Index	Male	41	No
DHQ 2	Nankana Sahib	Index	Male	41	No
DHQ 2	Nankana Sahib	Index	Male	41	No
RHC 1	Hafizabad	Index	Male	41	No
RHC 14	Nankana Sahib	Index	Male	41	No
RHC 14	Nankana Sahib	Index	Male	41	No
DHQ 2	Nankana Sahib	Index	Female	41	No
THQ 2	Nankana Sahib	Index	Female	41	No
THQ 2	Nankana Sahib	Index	Female	41	No
RHC 11	Nankana Sahib	Index	Male	41	No
THQ 2	Nankana Sahib	Index	Female	41	No
RHC 8	Nankana Sahib	Index	Male	41	No
RHC 9	Nankana Sahib	Index	Male	41	No
RHC 14	Nankana Sahib	Index	Male	41	No
THQ 1	Hafizabad	Index	Male	41	No
RHC 11	Nankana Sahib	Index	Male	41	No
RHC 7	Hafizabad	Contact	Male	41	No		Contact	No	NO					Loss to Follow up
DHQ 2	Nankana Sahib	Contact	Male	41	No		Contact	Yes	NO		Abnormality not detected			TPT Eligible	NO
RHC 14	Nankana Sahib	Contact	Male	41	No		Contact	Yes	NO		Abnormality not detected			TPT Eligible	NO
DHQ 2	Nankana Sahib	Index	Female	41	No
DHQ 2	Nankana Sahib	Index	Male	42	No
RHC 13	Nankana Sahib	Index	Female	42	No
DHQ 2	Nankana Sahib	Index	Male	42	No
DHQ 2	Nankana Sahib	Index	Male	42	No
THQ 2	Nankana Sahib	Index	Male	42	No
RHC 3	Hafizabad	Index	Female	42	No
DHQ 2	Nankana Sahib	Index	Male	42	No
DHQ 2	Nankana Sahib	Index	Male	42	No
RHC 9	Nankana Sahib	Index	Male	42	No
DHQ 2	Nankana Sahib	Index	Male	42	No
RHC 4	Hafizabad	Index	Female	42	No
RHC 3	Nankana Sahib	Index	Female	42	No
RHC 1	Hafizabad	Index	Male	42	No
DHQ 2	Nankana Sahib	Index	Female	42	No
RHC 10	Nankana Sahib	Index	Male	42	No
RHC 12	Nankana Sahib	Index	Female	42	No
THQ 2	Nankana Sahib	Index	Female	42	No
RHC 5	Hafizabad	Index	Female	42	No
RHC 2	Hafizabad	Index		42	No
RHC 1	Hafizabad	Index	Male	42	No
DHQ 2	Nankana Sahib	Index	Male	42	No
DHQ 2	Nankana Sahib	Index	Male	42	No
RHC 8	Nankana Sahib	Index	Male	42	No
RHC 3	Nankana Sahib	Index	Female	42	No
RHC 11	Nankana Sahib	Index	Male	42	No
RHC 4	Hafizabad	Index	Female	42	No
DHQ 2	Nankana Sahib	Contact	Female	42	No		Contact							Loss to Follow up
THQ 2	Nankana Sahib	Contact	Male	42	No		Contact	Yes	YES	current cough	Abnormality not detected		Smear Negative	TPT Eligible	NO
THQ 1	Hafizabad	Contact	Female	42	No		Contact							Loss to Follow up
RHC 9	Nankana Sahib	Contact	Male	42	No		Contact	Yes	NO		Abnormality not detected			TPT Eligible	NO
RHC 3	Hafizabad	Contact	Female	42	No		Contact
RHC 14	Nankana Sahib	Contact	Female	42	No		Contact	Yes	NO		Abnormality not detected			TPT Eligible	NO
RHC 10	Nankana Sahib	Contact	Female	42	No		Contact	Yes	NO		Abnormality not detected			TPT Eligible	NO
DHQ 2	Nankana Sahib	Contact	Male	42	No		Contact	Yes	NO		Abnormality not detected			TPT Eligible	NO
RHC 2	Hafizabad	Contact	Male	7	No		Contact	Yes	NO		Abnormality not detected			TPT Eligible	YES	Single	3	3HP (weekly)	Completed
RHC 10	Nankana Sahib	Contact	Male	32	No		Contact	Yes	NO					Refusal
DHQ 1	Hafizabad	Contact	Female	35	No		Contact							Refusal
RHC 14	Nankana Sahib	Contact	Male	8	No		Contact							Refusal
RHC 2	Hafizabad	Contact	Male	42	No		Contact							Loss to Follow up
RHC 11	Nankana Sahib	Contact	Male	42	No		Contact	Yes	NO		Abnormality not detected			TPT Eligible	NO
DHQ 2	Nankana Sahib	Contact	Male	42	No		Contact							Loss to Follow up
RHC 9	Nankana Sahib	Contact	Female	42	No		Contact	Yes	NO		Abnormality not detected			TPT Eligible	NO
RHC 11	Nankana Sahib	Contact	Male	42	No		Contact	Yes	NO		Abnormality not detected			TPT Eligible	NO
DHQ 2	Nankana Sahib	Index	Female	42	No
RHC 14	Nankana Sahib	Index	Male	43	No
RHC 2	Hafizabad	Contact	Male	8	No		Contact	Yes	NO		Abnormality not detected			TPT Eligible	YES	Single	2	3HP (weekly)	Completed
DHQ 2	Nankana Sahib	Index	Male	43	No
THQ 2	Nankana Sahib	Index	Male	43	No
DHQ 1	Hafizabad	Index	Female	43
RHC 8	Nankana Sahib	Index	Male	43	No
DHQ 2	Nankana Sahib	Index	Male	43	No
DHQ 2	Nankana Sahib	Index	Male	43	No
THQ 2	Nankana Sahib	Index	Male	43	No
RHC 2	Hafizabad	Index	Female	43	No
DHQ 2	Nankana Sahib	Index	Female	43	No
THQ 1	Hafizabad	Index	Male	43	No
DHQ 2	Nankana Sahib	Index	Female	43	No
DHQ 2	Nankana Sahib	Index	Male	43	No
RHC 2	Hafizabad	Index	Female	43	No
RHC 9	Nankana Sahib	Index	Female	43	No
THQ 2	Nankana Sahib	Index	Female	43	No
RHC 9	Nankana Sahib	Index	Female	43	No
RHC 5	Hafizabad	Index	Female	43	No
RHC 2	Hafizabad	Contact	Male	5	No		Contact	Yes	NO		Abnormality not detected			TPT Eligible	YES	Single	1	3HP (weekly)	Completed
DHQ 1	Hafizabad	Index	Male	43	No
DHQ 2	Nankana Sahib	Contact	Male	43	No		Contact							Loss to Follow up
DHQ 2	Nankana Sahib	Contact	Male	30	No		Contact	Yes	NO					Refusal
RHC 14	Nankana Sahib	Index	Male	43	No
RHC 11	Nankana Sahib	Index	Male	43	No
RHC 4	Hafizabad	Index	Female	43	No
THQ 2	Nankana Sahib	Index	Female	44	No
THQ 2	Nankana Sahib	Contact	Male	44	No		Contact							Loss to Follow up
RHC 10	Nankana Sahib	Contact	Male	44	No		Contact	Yes	NO		Abnormality not detected			TPT Eligible	NO
RHC 1	Hafizabad	Index	Male	44	No
RHC 2	Hafizabad	Contact	Male	7	No		Contact	Yes	NO		Abnormality not detected			TPT Eligible	YES	Single	3	3HP (weekly)	Completed
RHC 9	Nankana Sahib	Index	Male	44	No
DHQ 1	Hafizabad	Index	Male	44
RHC 3	Nankana Sahib	Index	Male	45	No
RHC 7	Hafizabad	Index	Male	45	No
THQ 1	Hafizabad	Index	Male	45	No
THQ 2	Nankana Sahib	Index	Male	45	No
RHC 5	Hafizabad	Index	Female	45	No
RHC 5	Hafizabad	Index	Male	45	No
RHC 5	Hafizabad	Index	Male	45	No
RHC 3	Hafizabad	Index	Female	45	No
DHQ 2	Nankana Sahib	Index	Female	45	No
RHC 5	Hafizabad	Index	Male	45	No
DHQ 2	Nankana Sahib	Index	Male	45	No
RHC 2	Hafizabad	Index	Male	45
RHC 1	Hafizabad	Index	Female	45	No
RHC 9	Nankana Sahib	Index	Male	45	No
THQ 1	Hafizabad	Index	Male	45	No
RHC 2	Hafizabad	Index	Male	45	No
THQ 2	Nankana Sahib	Index	Male	45	No
RHC 3	Nankana Sahib	Index	Male	45	No
RHC 3	Hafizabad	Index	Male	45	No
RHC 2	Hafizabad	Index	Male	45	No
DHQ 2	Nankana Sahib	Index	Male	45	No
DHQ 1	Hafizabad	Index	Female	45	No
RHC 4	Hafizabad	Index	Female	45
RHC 9	Nankana Sahib	Index	Male	45	No
RHC 14	Nankana Sahib	Index	Female	45
RHC 14	Nankana Sahib	Index	Male	45	No
DHQ 2	Nankana Sahib	Index	Male	45	No
RHC 2	Hafizabad	Contact	Male	26	No		Contact	Yes	YES	fever	Abnormality not detected		Smear Negative	TPT Eligible	YES	Married	6	3HP (weekly)	Completed
RHC 8	Nankana Sahib	Index	Male	45	No
RHC 8	Nankana Sahib	Index	Male	45	No
RHC 2	Hafizabad	Index	Female	45	No
THQ 2	Nankana Sahib	Index	Female	45	No
RHC 2	Hafizabad	Index	Female	45	No
DHQ 1	Hafizabad	Contact	Female	45	No		Contact							Loss to Follow up
THQ 2	Nankana Sahib	Contact	Male	45	No		Contact	Yes	NO		Abnormality not detected			TPT Eligible	NO
DHQ 1	Hafizabad	Contact	Female	45	No		Contact							Loss to Follow up
RHC 5	Hafizabad	Contact	Male	45	No		Contact							Loss to Follow up
THQ 1	Hafizabad	Contact	Male	45	No		Contact							Loss to Follow up
DHQ 2	Nankana Sahib	Contact	Female	45	No		Contact							Loss to Follow up
RHC 9	Nankana Sahib	Contact	Female	45	No		Contact							Loss to Follow up
DHQ 1	Hafizabad	Contact	Male	45	No		Contact							Loss to Follow up
THQ 2	Nankana Sahib	Contact	Female	45	No		Contact							Loss to Follow up
RHC 12	Nankana Sahib	Contact	Female	45	No		Contact	Yes	YES	current cough	Abnormality Detected		Smear Negative	TPT Eligible	NO
RHC 3	Hafizabad	Contact	Female	45	No		Contact
THQ 1	Hafizabad	Contact	Female	45	No		Contact	Yes	NO		Abnormality not detected			TPT Eligible	NO
THQ 2	Nankana Sahib	Contact	Female	45	No		Contact							Loss to Follow up
DHQ 1	Hafizabad	Contact	Male	45	No		Contact	Yes	NO		Abnormality not detected			TPT Eligible	NO
RHC 10	Nankana Sahib	Contact	Male	45	No		Contact	Yes	NO		Abnormality not detected			TPT Eligible	NO
RHC 14	Nankana Sahib	Contact	Female	45	No		Contact	Yes	NO		Abnormality not detected			TPT Eligible	NO
DHQ 2	Nankana Sahib	Contact	Female	45	No		Contact	Yes	NO		Abnormality not detected			TPT Eligible	NO
DHQ 2	Nankana Sahib	Contact	Male	45	No		Contact							Loss to Follow up
DHQ 2	Nankana Sahib	Contact	Female	15	No		Contact	No	NO					Refusal
RHC 14	Nankana Sahib	Contact	Female	9	No		Contact	Yes	NO					Refusal
RHC 9	Nankana Sahib	Contact	Female	16	No		Contact	Yes	NO					Refusal
DHQ 2	Nankana Sahib	Contact	Male	32	No		Contact	Yes	NO					Refusal
THQ 2	Nankana Sahib	Contact	Female	34	No		Contact	Yes	NO					Refusal
RHC 1	Hafizabad	Contact	Female	40	No		Contact							Refusal
DHQ 2	Nankana Sahib	Contact	Female	45	No		Contact							Refusal
DHQ 2	Nankana Sahib	Contact	Male	29	No		Contact	Yes	NO					Refusal
DHQ 2	Nankana Sahib	Contact	Male	32	No		Contact	Yes	NO					Refusal
RHC 5	Hafizabad	Contact	Male	4	No		Contact							Refusal
RHC 10	Nankana Sahib	Contact	Male	56	No		Contact							Refusal
RHC 1	Hafizabad	Contact	Female	18	No		Contact							Refusal
RHC 1	Hafizabad	Contact	Female	10	No		Contact							Refusal
DHQ 2	Nankana Sahib	Contact	Female	45	No		Contact							Refusal
RHC 1	Hafizabad	Contact	Male	30	No		Contact							Refusal
RHC 8	Nankana Sahib	Contact	Male	4	No		Contact	Yes	NO					Refusal
THQ 1	Hafizabad	Contact	Male	45	No		Contact	Yes	NO		Abnormality not detected			TPT Eligible	NO
DHQ 1	Hafizabad	Contact	Male	45	No		Contact	No	NO					Loss to Follow up
THQ 2	Nankana Sahib	Contact	Female	45	No		Contact	Yes	NO		Abnormality not detected			TPT Eligible	NO
RHC 2	Hafizabad	Contact	Female	45	No		Contact							Loss to Follow up
RHC 5	Hafizabad	Contact	Male	45	No		Contact							Loss to Follow up
RHC 5	Hafizabad	Contact	Male	45	No		Contact							Loss to Follow up
DHQ 2	Nankana Sahib	Contact	Male	45	No		Contact							Loss to Follow up
RHC 14	Nankana Sahib	Contact	Female	45	No		Contact	Yes	NO		Abnormality not detected			TPT Eligible	NO
DHQ 2	Nankana Sahib	Contact	Male	45	No		Contact							Loss to Follow up
THQ 2	Nankana Sahib	Contact	Female	45	No		Contact	Yes	NO		Abnormality not detected			TPT Eligible	NO
RHC 11	Nankana Sahib	Contact	Male	45	No		Contact	Yes	NO		Abnormality not detected			TPT Eligible	NO
RHC 14	Nankana Sahib	Contact	Male	45	No		Contact	Yes	NO		Abnormality not detected			TPT Eligible	NO
RHC 10	Nankana Sahib	Contact	Female	45	No		Contact	Yes	NO		Abnormality not detected			TPT Eligible	NO
DHQ 2	Nankana Sahib	Contact	Male	45	No		Contact							Loss to Follow up
RHC 4	Hafizabad	Contact	Male	45	No		Contact	Yes	YES	current cough	Abnormality not detected		Smear Negative	TPT Eligible	NO
RHC 4	Hafizabad	Contact	Female	45	No		Contact	Yes	YES	current cough	Abnormality not detected		Smear Negative	TPT Eligible	NO
DHQ 2	Nankana Sahib	Index	Female	45	No
RHC 4	Hafizabad	Index	Female	45
RHC 2	Hafizabad	Index	Female	45
RHC 14	Nankana Sahib	Index	Female	45	No
THQ 1	Hafizabad	Index	Male	46	No
RHC 9	Nankana Sahib	Index	Male	46	No
RHC 1	Hafizabad	Index	Male	46	No
DHQ 1	Hafizabad	Index	Male	46	No
RHC 5	Hafizabad	Index	Male	46	No
DHQ 2	Nankana Sahib	Index	Male	46	No
RHC 14	Nankana Sahib	Index	Male	46	No
RHC 11	Nankana Sahib	Index	Male	46	No
RHC 8	Nankana Sahib	Index	Male	46	No
RHC 10	Nankana Sahib	Index	Male	46	No
THQ 2	Nankana Sahib	Index	Male	46	No
RHC 8	Nankana Sahib	Index	Male	46	No
RHC 8	Nankana Sahib	Index	Male	46	No
DHQ 2	Nankana Sahib	Index	Male	46	No
DHQ 2	Nankana Sahib	Index	Female	46	No
RHC 11	Nankana Sahib	Index	Male	46	No
DHQ 2	Nankana Sahib	Index	Female	46	No
DHQ 1	Hafizabad	Index	Female	46	No
RHC 13	Nankana Sahib	Index	Male	46	No
DHQ 2	Nankana Sahib	Index	Male	46	No
DHQ 2	Nankana Sahib	Contact	Female	46	No		Contact							Loss to Follow up
RHC 13	Nankana Sahib	Contact	Female	46	No		Contact	Yes	NO		Abnormality not detected			TPT Eligible	NO
DHQ 2	Nankana Sahib	Contact	Female	46	No		Contact	Yes	NO		Abnormality not detected			TPT Eligible	NO
DHQ 2	Nankana Sahib	Contact	Male	20	No		Contact							Refusal
RHC 3	Hafizabad	Contact	Female	20	No		Contact							Refusal
DHQ 2	Nankana Sahib	Contact	Female	46	No		Contact							Loss to Follow up
RHC 10	Nankana Sahib	Contact	Male	46	No		Contact	Yes	NO		Abnormality not detected			TPT Eligible	NO
DHQ 2	Nankana Sahib	Contact	Male	46	No		Contact	Yes	NO		Abnormality not detected			TPT Eligible	NO
DHQ 2	Nankana Sahib	Contact	Male	46	No		Contact							Loss to Follow up
RHC 14	Nankana Sahib	Contact	Male	46	No		Contact	Yes	NO		Abnormality not detected			TPT Eligible	NO
RHC 2	Hafizabad	Index	Female	46
DHQ 2	Nankana Sahib	Index	Female	46	No
RHC 14	Nankana Sahib	Index	Male	46	No
DHQ 2	Nankana Sahib	Index	Female	46	No
RHC 12	Nankana Sahib	Index	Female	46
RHC 14	Nankana Sahib	Index	Male	47	No
RHC 8	Nankana Sahib	Index	Male	47	No
DHQ 2	Nankana Sahib	Index	Male	47	No
THQ 1	Hafizabad	Index	Female	47	No
DHQ 2	Nankana Sahib	Index	Male	47	No
RHC 12	Nankana Sahib	Index	Male	47	No
RHC 12	Nankana Sahib	Index	Male	47	No
RHC 8	Nankana Sahib	Index	Male	47	No
RHC 2	Hafizabad	Index	Female	47
DHQ 2	Nankana Sahib	Index	Male	47	No
DHQ 2	Nankana Sahib	Index	Female	47	No
RHC 8	Nankana Sahib	Contact	Male	47	No		Contact	Yes	NO		Abnormality not detected			TPT Eligible	NO
RHC 8	Nankana Sahib	Contact	Male	47	No		Contact	Yes	YES	fever	Abnormality Detected		Smear Negative	TPT Eligible	NO
DHQ 1	Hafizabad	Contact	Female	33	No		Contact	No						Refusal
RHC 12	Nankana Sahib	Index	Male	47	No
RHC 11	Nankana Sahib	Index	Female	47	No
RHC 14	Nankana Sahib	Index	Male	47	No
RHC 5	Hafizabad	Index	Male	47	No
DHQ 2	Nankana Sahib	Index	Male	47	No
RHC 14	Nankana Sahib	Index	Male	48	No
RHC 2	Hafizabad	Index	Male	48	No
THQ 1	Hafizabad	Index	Male	48	No
RHC 9	Nankana Sahib	Index	Male	48	No
THQ 2	Nankana Sahib	Index	Male	48	No
THQ 1	Hafizabad	Index	Male	48	No
RHC 2	Hafizabad	Index	Female	48	No
RHC 14	Nankana Sahib	Contact	Male	48	No		Contact	Yes	NO		Abnormality not detected			TPT Eligible	NO
RHC 14	Nankana Sahib	Contact	Male	48	No		Contact	Yes	NO		Abnormality not detected			TPT Eligible	NO
RHC 5	Hafizabad	Contact	Male	48	No		Contact - Current TB
THQ 2	Nankana Sahib	Contact	Male	48	No		Contact							Loss to Follow up
RHC 5	Hafizabad	Contact	Male	48	No		Contact							Loss to Follow up
RHC 9	Nankana Sahib	Contact	Male	48	No		Contact	Yes	NO		Abnormality not detected			TPT Eligible	NO
RHC 10	Nankana Sahib	Contact	Female	48	No		Contact							Loss to Follow up
RHC 2	Hafizabad	Contact	Female	48	No		Contact							Loss to Follow up
THQ 2	Nankana Sahib	Contact	Female	45	No		Contact							Refusal
RHC 2	Hafizabad	Contact	Female	30	No		Contact							Refusal
RHC 1	Hafizabad	Contact	Male	25	No		Contact							Refusal
RHC 10	Nankana Sahib	Contact	Male	60	No		Contact							Refusal
RHC 3	Hafizabad	Contact	Male	9	No		Contact							Refusal
RHC 14	Nankana Sahib	Contact	Male	14	No		Contact	Yes	NO					Refusal
RHC 9	Nankana Sahib	Contact	Male	48	No		Contact	Yes	NO		Abnormality not detected			TPT Eligible	NO
THQ 2	Nankana Sahib	Contact	Female	48	No		Contact							Loss to Follow up
RHC 2	Hafizabad	Index	Male	48
RHC 2	Hafizabad	Index	Female	48	No
RHC 14	Nankana Sahib	Index	Female	48	No
THQ 1	Hafizabad	Index	Female	48	No
RHC 9	Nankana Sahib	Index	Female	48	No
RHC 14	Nankana Sahib	Index	Female	49	No
DHQ 2	Nankana Sahib	Index	Female	49	No
RHC 5	Hafizabad	Index	Female	49	No
RHC 10	Nankana Sahib	Index	Male	49	No
THQ 1	Hafizabad	Index		49	No
THQ 1	Hafizabad	Index	Female	49	No
RHC 1	Hafizabad	Index	Male	49	No
RHC 14	Nankana Sahib	Index	Male	49	No
RHC 1	Hafizabad	Index	Male	49	No
DHQ 1	Hafizabad	Index	Male	49
RHC 8	Nankana Sahib	Index	Male	49	No
RHC 8	Nankana Sahib	Index	Male	49	No
RHC 1	Hafizabad	Index	Male	49	No
DHQ 2	Nankana Sahib	Index	Female	49	No
DHQ 2	Nankana Sahib	Contact	Male	49	No		Contact							Loss to Follow up
RHC 1	Hafizabad	Contact	Male	49	No		Contact	Yes	YES	current cough	Abnormality Detected		Smear Positive	TB Patient
THQ 1	Hafizabad	Contact	Female	49	No		Contact							Loss to Follow up
RHC 12	Nankana Sahib	Contact	Female	49	No		Contact	Yes	NO		Abnormality not detected			TPT Eligible	NO
RHC 14	Nankana Sahib	Contact	Female	49	No		Contact							Loss to Follow up
DHQ 2	Nankana Sahib	Index	Male	49	No
RHC 3	Hafizabad	Contact	Male	5	No		Contact
RHC 7	Hafizabad	Contact	Male	5	No		Contact	Yes	NO		Abnormality not detected			TPT Eligible	NO
RHC 1	Hafizabad	Contact	Female	5	No		Contact	Yes	NO		Abnormality not detected			TPT Eligible	NO
RHC 11	Nankana Sahib	Contact	Male	5	No		Contact	Yes	NO		Abnormality not detected			TPT Eligible	NO
RHC 1	Hafizabad	Contact	Male	5	No		Contact							Loss to Follow up
RHC 5	Hafizabad	Contact	Male	5	No		Contact							Loss to Follow up
RHC 5	Hafizabad	Contact	Female	5	No		Contact							Loss to Follow up
THQ 2	Nankana Sahib	Contact	Female	5	No		Contact							Loss to Follow up
DHQ 1	Hafizabad	Contact	Male	5	No		Contact							Loss to Follow up
RHC 2	Hafizabad	Contact	Male	25	No		Contact	Yes	NO		Abnormality not detected			TPT Eligible	YES	Married	10	3HP (weekly)	Completed
RHC 5	Hafizabad	Contact	Male	5	No		Contact							Loss to Follow up
RHC 5	Hafizabad	Contact	Female	5	No		Contact							Loss to Follow up
DHQ 1	Hafizabad	Contact	Male	16	No		Contact							Refusal
RHC 2	Hafizabad	Contact	Female	5	No		Contact							Refusal
RHC 1	Hafizabad	Contact	Male	18	No		Contact							Refusal
DHQ 1	Hafizabad	Contact	Male	19	No		Contact							Refusal
RHC 10	Nankana Sahib	Contact	Male	30	No		Contact	Yes	NO					Refusal
RHC 11	Nankana Sahib	Contact	Male	1	No		Contact	Yes	NO					Refusal
RHC 1	Hafizabad	Contact	Male	10	No		Contact							Refusal
RHC 1	Hafizabad	Contact	Female	25	No		Contact	No	NO					Refusal
THQ 2	Nankana Sahib	Contact	Female	10	No		Contact	Yes	NO					Refusal
RHC 4	Hafizabad	Contact	Female	25	No		Contact	No	NO					Refusal
RHC 3	Hafizabad	Contact	Female	14	No		Contact							Refusal
RHC 1	Hafizabad	Contact	Female	18	No		Contact							Refusal
RHC 11	Nankana Sahib	Contact	Female	15	No		Contact	Yes	NO					Refusal
RHC 14	Nankana Sahib	Contact	Female	29	No		Contact							Refusal
RHC 10	Nankana Sahib	Contact	Female	30	No		Contact	Yes	NO					Refusal
THQ 1	Hafizabad	Contact	Female	0	Yes	5	Contact							Refusal
DHQ 1	Hafizabad	Contact	Male	50	No		Contact	No	NO					Refusal
RHC 14	Nankana Sahib	Contact	Female	21	No		Contact	Yes	NO					Refusal
RHC 5	Hafizabad	Contact	Female	5	No		Contact							Refusal
DHQ 1	Hafizabad	Contact	Female	28	No		Contact							Refusal
RHC 10	Nankana Sahib	Contact	Male	47	No		Contact	Yes	NO					Refusal
DHQ 2	Nankana Sahib	Contact	Male	8	No		Contact							Refusal
[truncated: 1,512 more rows]
