# Supplementary material for: Integrating chest radiography tuberculosis screening and preventive treatment for contacts in primary healthcare settings in Pakistan
Source: Research Square preprint supplement (doi:10.21203/rs.3.rs-7785377/v1), 2025-11-06
Supplement: Supplementary file 2 [file f2b7ed02113fcedd81227b0a.pdf]

***Integrating chest radiography tuberculosis screening and preventive treatment  
for contacts in primary healthcare settings in Pakistan***

**Topic guide: Index patient**

| Areas                                                                                                  | Prompts                                                                                                                                                                                                                                                                                                                                                                                                                                                                                       |
|--------------------------------------------------------------------------------------------------------|-----------------------------------------------------------------------------------------------------------------------------------------------------------------------------------------------------------------------------------------------------------------------------------------------------------------------------------------------------------------------------------------------------------------------------------------------------------------------------------------------|
|                                                                                                        | <b>Experience: how done, challenges (time, social etc.) and how managed, provider response.</b>                                                                                                                                                                                                                                                                                                                                                                                               |
| Would you kindly share your experience of being <b>oriented</b> on screening process?                  | <ul style="list-style-type: none"> <li>• Inform <ul style="list-style-type: none"> <li>○ Provider narrative and its delivery</li> <li>○ Disclosing TB status to family members</li> <li>○ Any other concern</li> </ul> </li> </ul>                                                                                                                                                                                                                                                            |
| Would you kindly share your <b>experience of listing household contacts</b> for TB screening?          | <ul style="list-style-type: none"> <li>• Listing of household contacts <ul style="list-style-type: none"> <li>○ Complete listing of household contacts (children, females)</li> <li>○ Household contacts information required</li> </ul> </li> </ul>                                                                                                                                                                                                                                          |
| Would you kindly share your <b>household contacts experience in screening process?</b>                 | <ul style="list-style-type: none"> <li>• Deciding to get screened</li> <li>• Experience at facility (availability of staff, CXR Screening children)</li> <li>• Challenges (if any) in CXR screening? How managed&gt; <ul style="list-style-type: none"> <li>○ Social factors</li> <li>○ Medical issues (pregnancy, other constraints)</li> <li>○ Staff behaviour</li> <li>○ Timing/ scheduling of screening</li> <li>○ Availability of other family members</li> </ul> </li> <li>•</li> </ul> |
| Would you kindly share your household contacts experience in <b>receiving TB preventive treatment?</b> | <ul style="list-style-type: none"> <li>• Acceptance of TB preventive treatment</li> <li>• Receiving the prescription of TPT treatment (including children)</li> <li>• Challenge (if any) in getting the prescribed TPT treatment? and how managed? <ul style="list-style-type: none"> <li>○ Regimen prescription</li> <li>○ Taking preventive without presence of symptoms</li> <li>○ Completing the required duration</li> </ul> </li> </ul>                                                 |
| Would you kindly share your household contacts experience of                                           | <ul style="list-style-type: none"> <li>• Visit to the health centre</li> <li>• Experience at facility (availability of staff, drug availability, counselling)</li> </ul>                                                                                                                                                                                                                                                                                                                      |

|                                               |                                                                                                                                                         |
|-----------------------------------------------|---------------------------------------------------------------------------------------------------------------------------------------------------------|
| <b>follow-ups</b> in TB preventive treatment? | <ul style="list-style-type: none"> <li>• Adherence/regularly taking drugs as prescribed (including children)</li> </ul>                                 |
| <b>Any other issue/ comment</b>               | <ul style="list-style-type: none"> <li>• Anything else you want to: <ul style="list-style-type: none"> <li>○ Tell</li> <li>○ Ask</li> </ul> </li> </ul> |
