# Supplementary material for: Integrating chest radiography tuberculosis screening and preventive treatment for contacts in primary healthcare settings in Pakistan
Source: Research Square preprint supplement (doi:10.21203/rs.3.rs-7785377/v1), 2025-11-06
Supplement: Supplementary file 3 [file fec2ac811bba133a408705f3.pdf]

***Integrating chest radiography tuberculosis screening and preventive treatment  
for contacts in primary healthcare settings in Pakistan***

**Topic guide: Allied Staff**

| Areas                                                                                                                                        | Prompts                                                                                                                                                                                                                                                                                                                                                                                                                                                                                                                                                                                                                                                             |
|----------------------------------------------------------------------------------------------------------------------------------------------|---------------------------------------------------------------------------------------------------------------------------------------------------------------------------------------------------------------------------------------------------------------------------------------------------------------------------------------------------------------------------------------------------------------------------------------------------------------------------------------------------------------------------------------------------------------------------------------------------------------------------------------------------------------------|
|                                                                                                                                              | <b>Experience: how done, challenges (time, social etc.) and how managed</b>                                                                                                                                                                                                                                                                                                                                                                                                                                                                                                                                                                                         |
| Would you kindly share you experience of <b>orienting household contacts</b> of household contacts on screening and TB preventive treatment? | <p>Inform/ convince – consent</p> <ul style="list-style-type: none"> <li>○ Narrative and its delivery</li> <li>○ Patient’s interest and willingness</li> </ul>                                                                                                                                                                                                                                                                                                                                                                                                                                                                                                      |
| Would you kindly share your experience of <b>Listing household contacts</b> of index TB patients?                                            | <p>Listing the household contacts:</p> <ul style="list-style-type: none"> <li>○ Complete listing of household contacts</li> <li>○ Confirmation of household contacts??</li> <li>○ Recording patients and their household contacts on “Screening Register”</li> </ul>                                                                                                                                                                                                                                                                                                                                                                                                |
| Would you kindly share you experience of <b>screening household contacts</b> of index patients for TB?                                       | <p>CXR screening of household contacts</p> <ul style="list-style-type: none"> <li>○ Convincing household members for CXR screening</li> <li>○ Household members concerns and readiness for CXR</li> <li>○ Scheduling for the household members screening process</li> <li>○ Challenges in logistics (waiting time, adequate Film supply? Functional X-ray machines)</li> </ul> <p>Reporting Screening outcomes</p> <ul style="list-style-type: none"> <li>○ Recording patients and their household contacts on “Screening Register”</li> <li>○ Declaring screening outcomes</li> <li>○ Handling refusals and loss-to-follow-ups/ (retrieving contacts??)</li> </ul> |
| Would you kindly share you experience of <b>prescribing and managing</b> TB preventing treatment for household contacts?                     | <p>Management of TPT prescription to household contacts</p> <ul style="list-style-type: none"> <li>○ Regimen availability</li> <li>○ Oral suspension/availability of syrups/palatability for children</li> <li>○ Consenting to TPT / household contacts’ characteristics impacting the uptake of TPT (gender, marital status, age)</li> </ul>                                                                                                                                                                                                                                                                                                                       |

|                                                                                                                                                |                                                                                                                                                                                                                                                                                                                                                                                                                                                                                                                  |
|------------------------------------------------------------------------------------------------------------------------------------------------|------------------------------------------------------------------------------------------------------------------------------------------------------------------------------------------------------------------------------------------------------------------------------------------------------------------------------------------------------------------------------------------------------------------------------------------------------------------------------------------------------------------|
|                                                                                                                                                | <p>Treatment Follow-up</p> <ul style="list-style-type: none"> <li>○ Contacting household contacts who are late</li> <li>○ Drug availability</li> </ul> <p>Reporting Treatment outcomes</p> <ul style="list-style-type: none"> <li>○ Recording patients and their household contacts on “Treatment Register”</li> <li>○ Declaring treatment outcomes</li> <li>○ Loss-to-follow-ups/ (retrieving contacts??)</li> </ul>                                                                                            |
| Would you kindly share you experience of <b>using “Prevent TB Application”</b> of household contacts on screening and TB preventing treatment? | <ul style="list-style-type: none"> <li>● Using prevent TB application for recording household contact screening and treatment data <ul style="list-style-type: none"> <li>○ Staff skills and usage</li> <li>○ Program Support provided to staff</li> <li>○ Difficulty in navigating the application/switching between screens /User experience (feasibility of using app)</li> <li>○ Functioning of application/serve issues</li> <li>○ Integration of application in the routine context</li> </ul> </li> </ul> |
| Would you kindly share you experience of <b>training</b> of household contacts on screening and TB preventing treatment?                       | <ul style="list-style-type: none"> <li>● Staff training <ul style="list-style-type: none"> <li>○ Training content</li> <li>○ Training conduct</li> </ul> </li> </ul>                                                                                                                                                                                                                                                                                                                                             |
| Any other issue/ comment                                                                                                                       | <ul style="list-style-type: none"> <li>● Anything else you want to: <ul style="list-style-type: none"> <li>○ Tell</li> <li>○ Ask</li> </ul> </li> </ul>                                                                                                                                                                                                                                                                                                                                                          |
